# Supplementary material
Source: PubMed Central journal article supplement (PMC8617081)

**Cell Chemical Biology, Volume 28**

**Supplemental information**

**On-tissue spatially resolved glycoproteomics guided  
by N-glycan imaging reveal global dysregulation  
of canine glioma glycoproteomic landscape**

**Stacy Alyse Malaker, Jusal Quanico, Antonella Raffo-Romero, Firas Kobeissy, Soulaymane Aboulouard, Dominique Tierny, Carolyn Ruth Bertozzi, Isabelle Fournier, and Michel Salzet**

**Supplementary Data 1. Magnified H&E stained images of anaplastic oligodendroglioma and glioblastoma specimens.** A: Magnified images of the pseudo-glomerular vessels (panels 1-2), necrotic region (3-4), margin (5-6) and tumor+necrotic region (7-8) taken at 40X, then at 100X, 200X or 400X magnification, in an anaplastic oligodendroglioma biopsy. Colored boxes indicate magnified regions in relation to the whole section. B: Magnified images of the pseudopalisading necrosis (panels 1-2), necrotic region (3-4), margin (5-6) and tumor+necrotic region (7-8), taken at 40X, then at 100X or 200X magnification. Colored boxes indicate magnified regions in relation to the whole section. Related to Figures 1 and 2.

# SD.1A

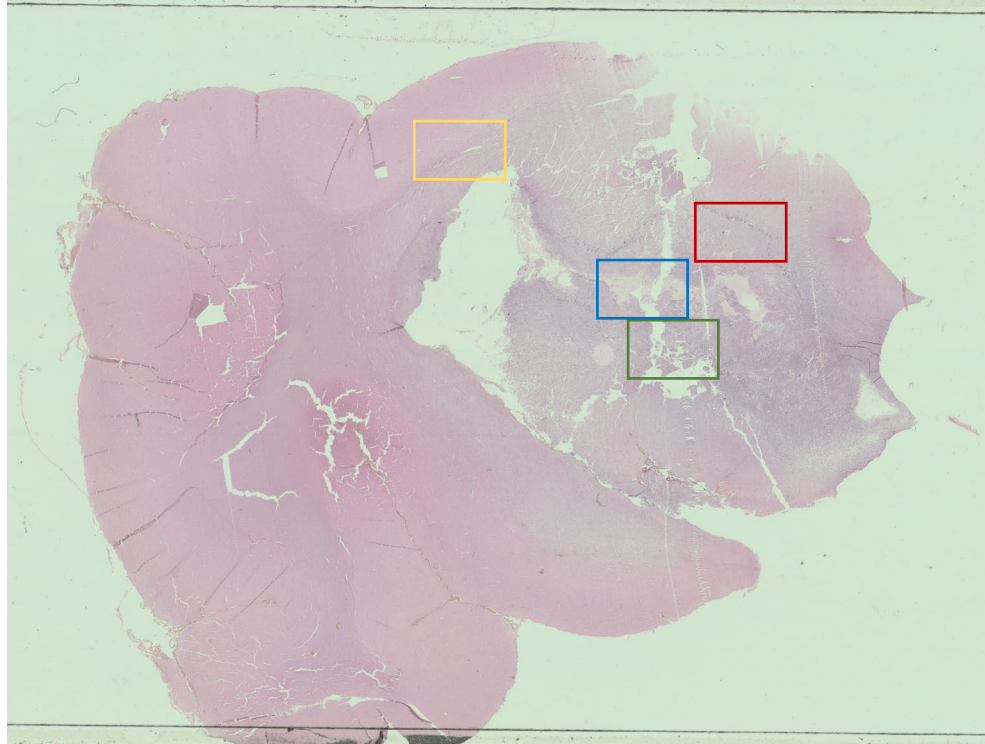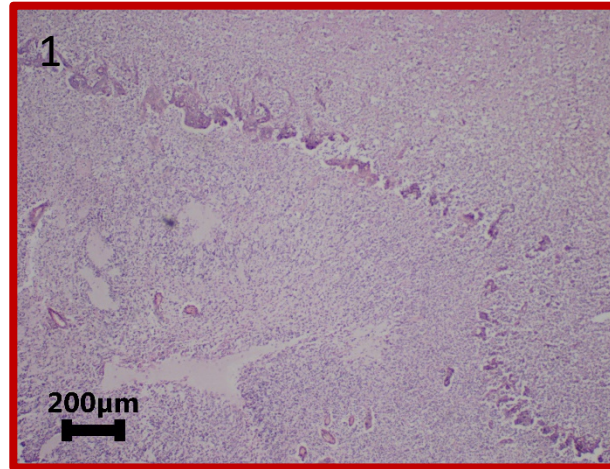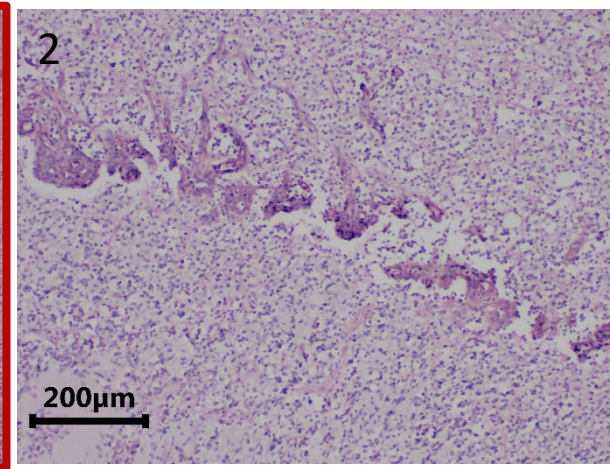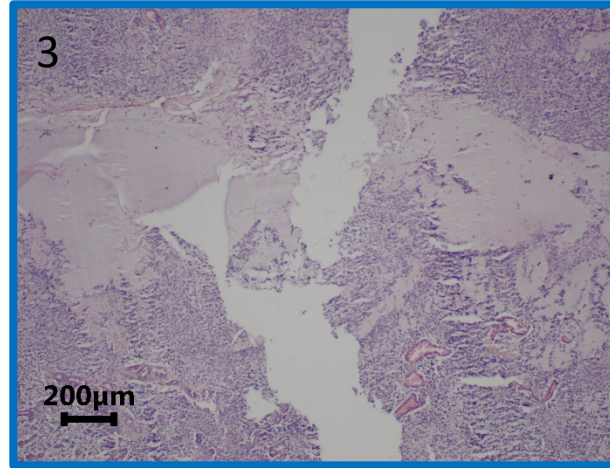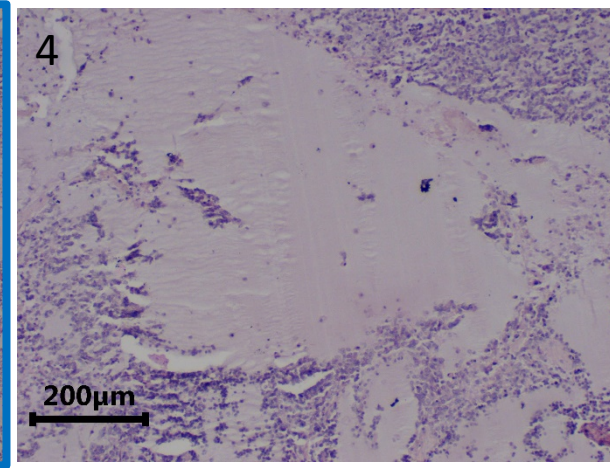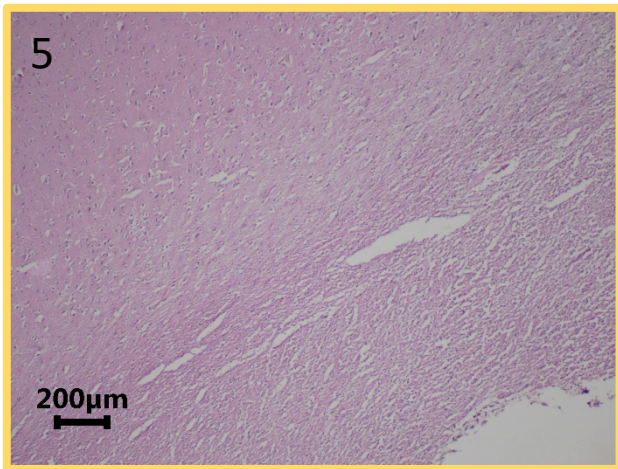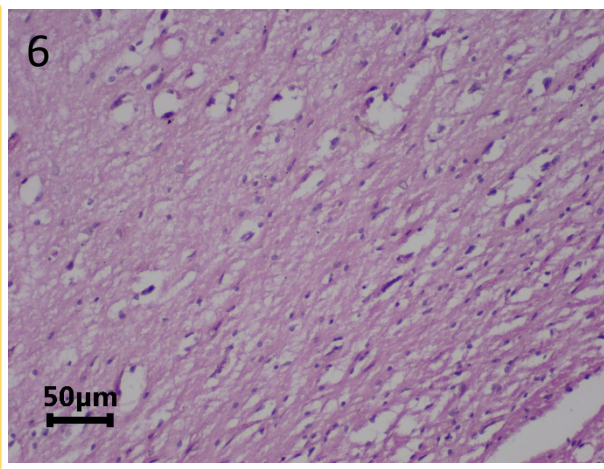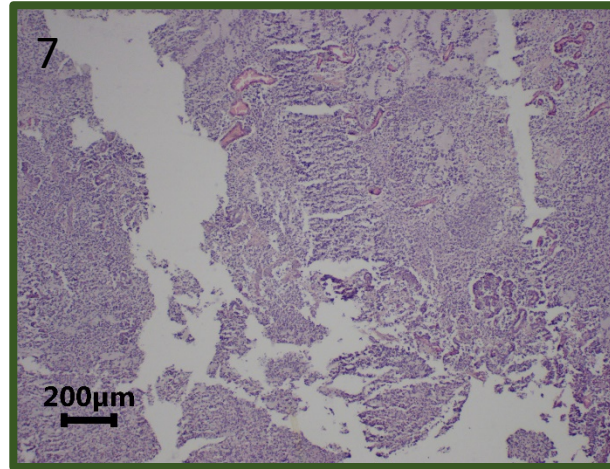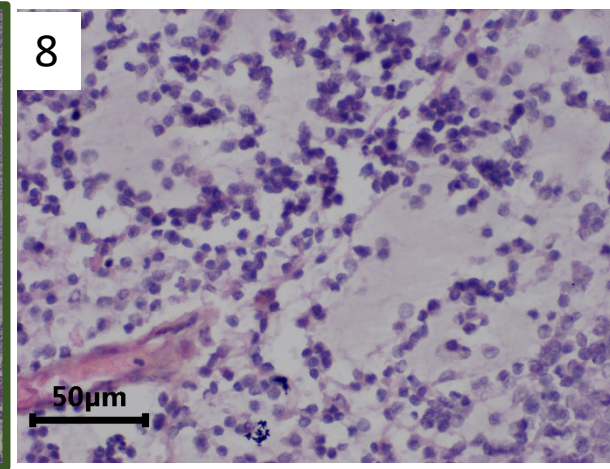

SD.1B

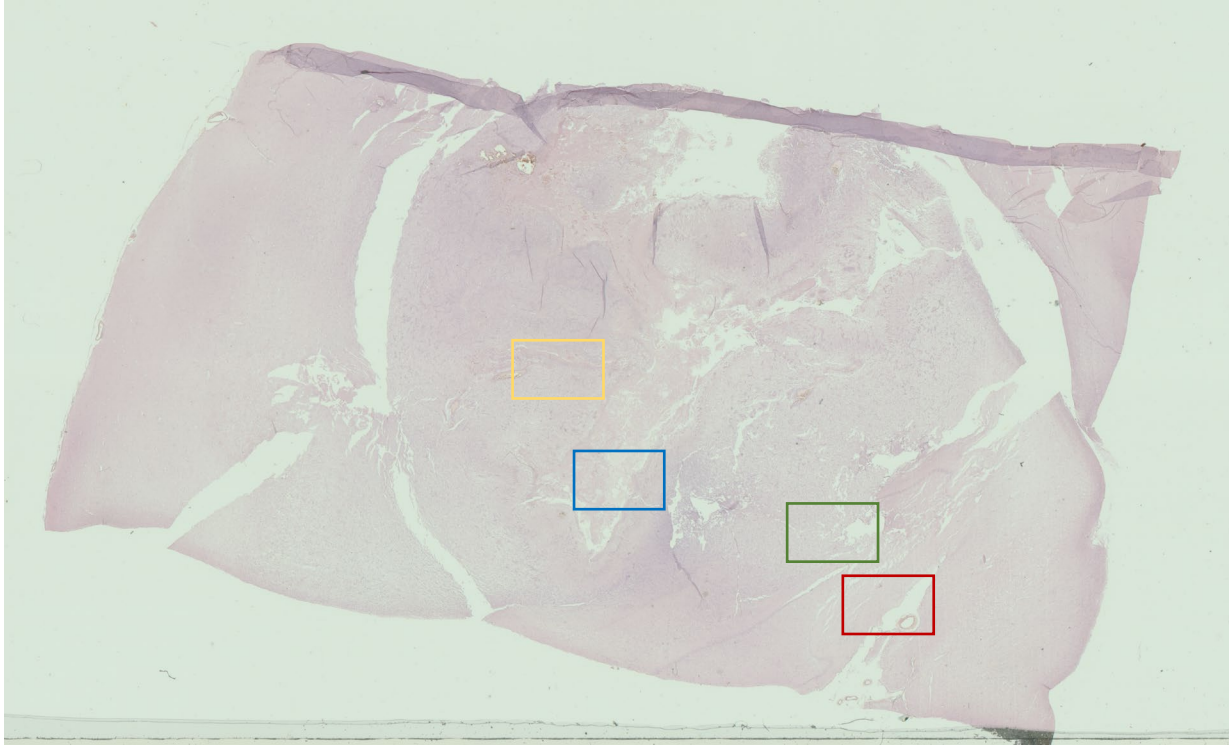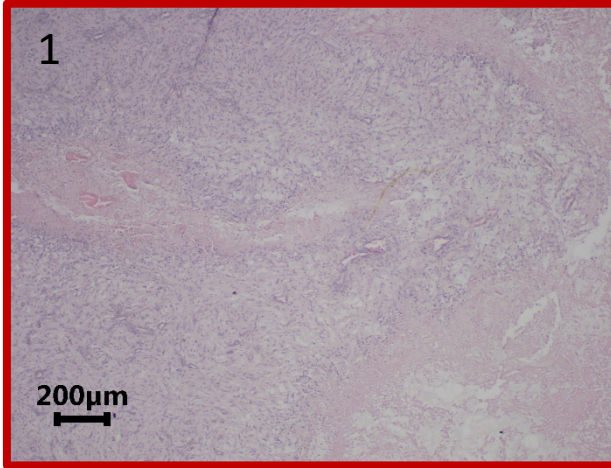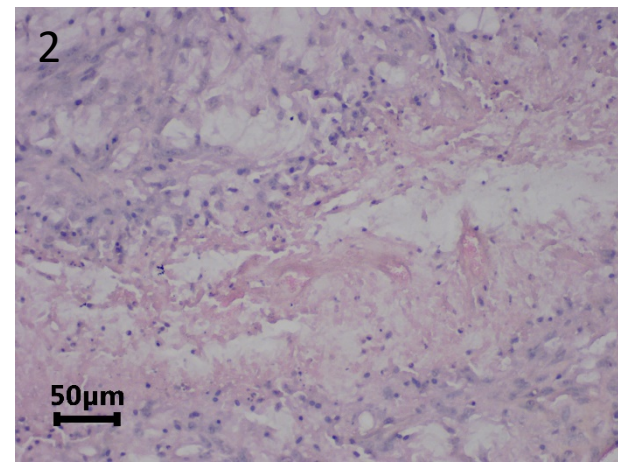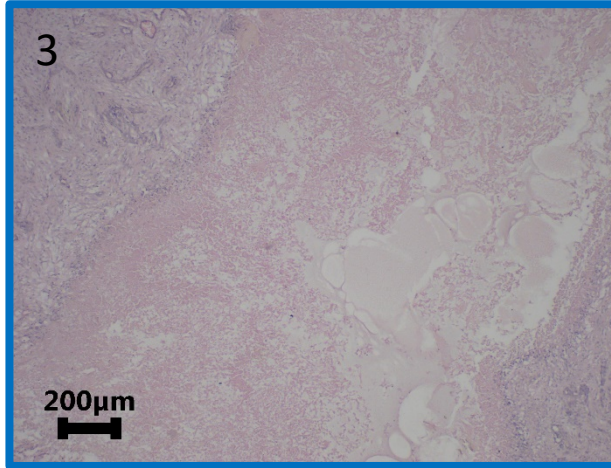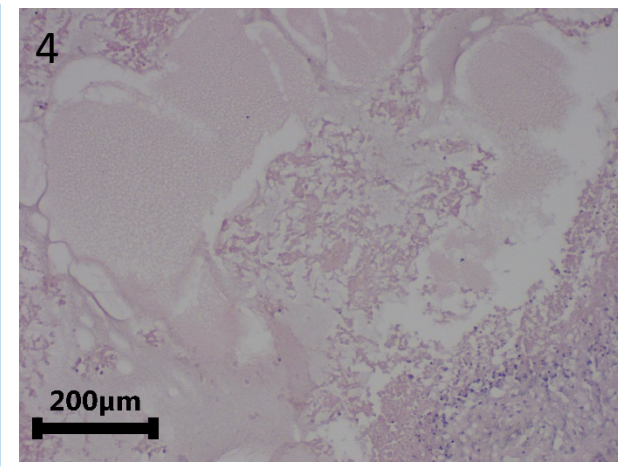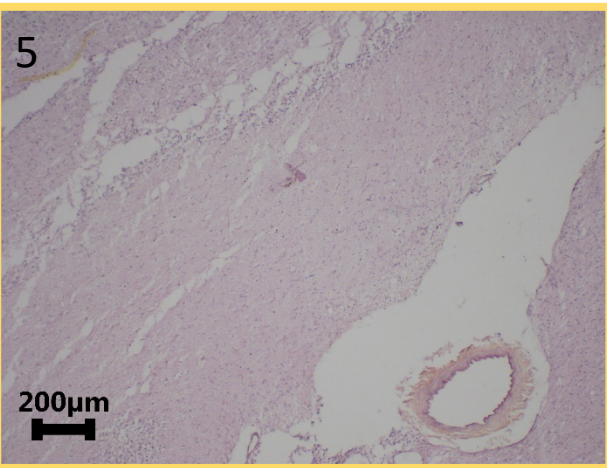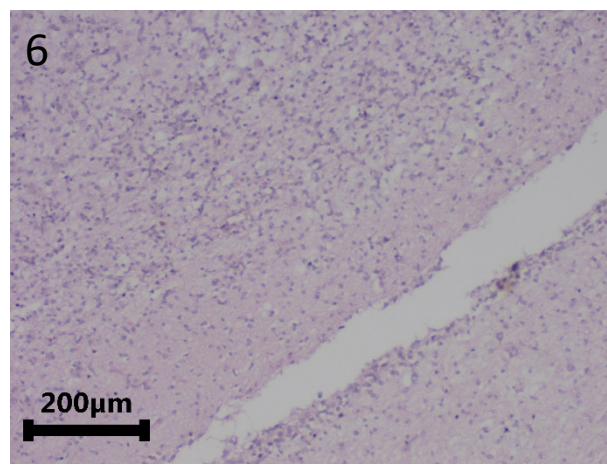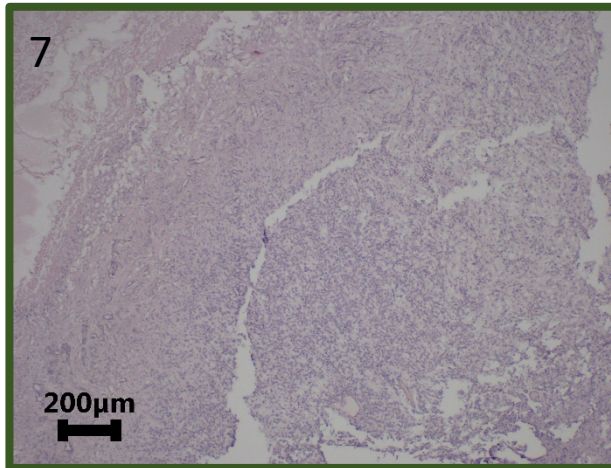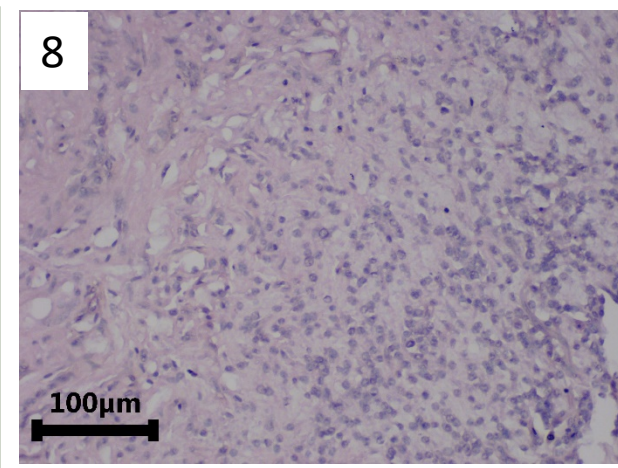

**Supplementary Data 2. MS<sub>n</sub> assignments.** MS<sub>n</sub> spectra were acquired directly on tissue using a MALDI LTQ Orbitrap instrument after images had been obtained. The MALDI LTQ Orbitrap XL is equipped with a commercial N<sub>2</sub> laser (LTB Lasertechnik, Berlin, Germany) operating at  $\lambda = 337$  nm with a maximum repetition rate of 60 Hz. The hybrid configuration replaces the heated capillary of the electrospray source with a q00 that sends packets of ions into a linear trap for collision-induced fragmentation (CID), with the fragment ions then being concentrated in a C-trap and transferred to the orbitrap for high-resolution mass analysis. The maximum energy per pulse was set to 12  $\mu$ J. Precursor ion isolation was performed using an isolation window between  $\pm 1$  and  $\pm 3$  Da and the fragments scanned with a maximum accumulation time of 120 ms. Succeeding MS<sub>n</sub> of the daughter ions were performed with a maximum accumulation time of 180 ms. External calibration was performed using the ProteoMass MALDI Calibration Kit (Sigma-Aldrich, St. Quentin-Fallavier, France). Related to Figure 1.

# SD 2A

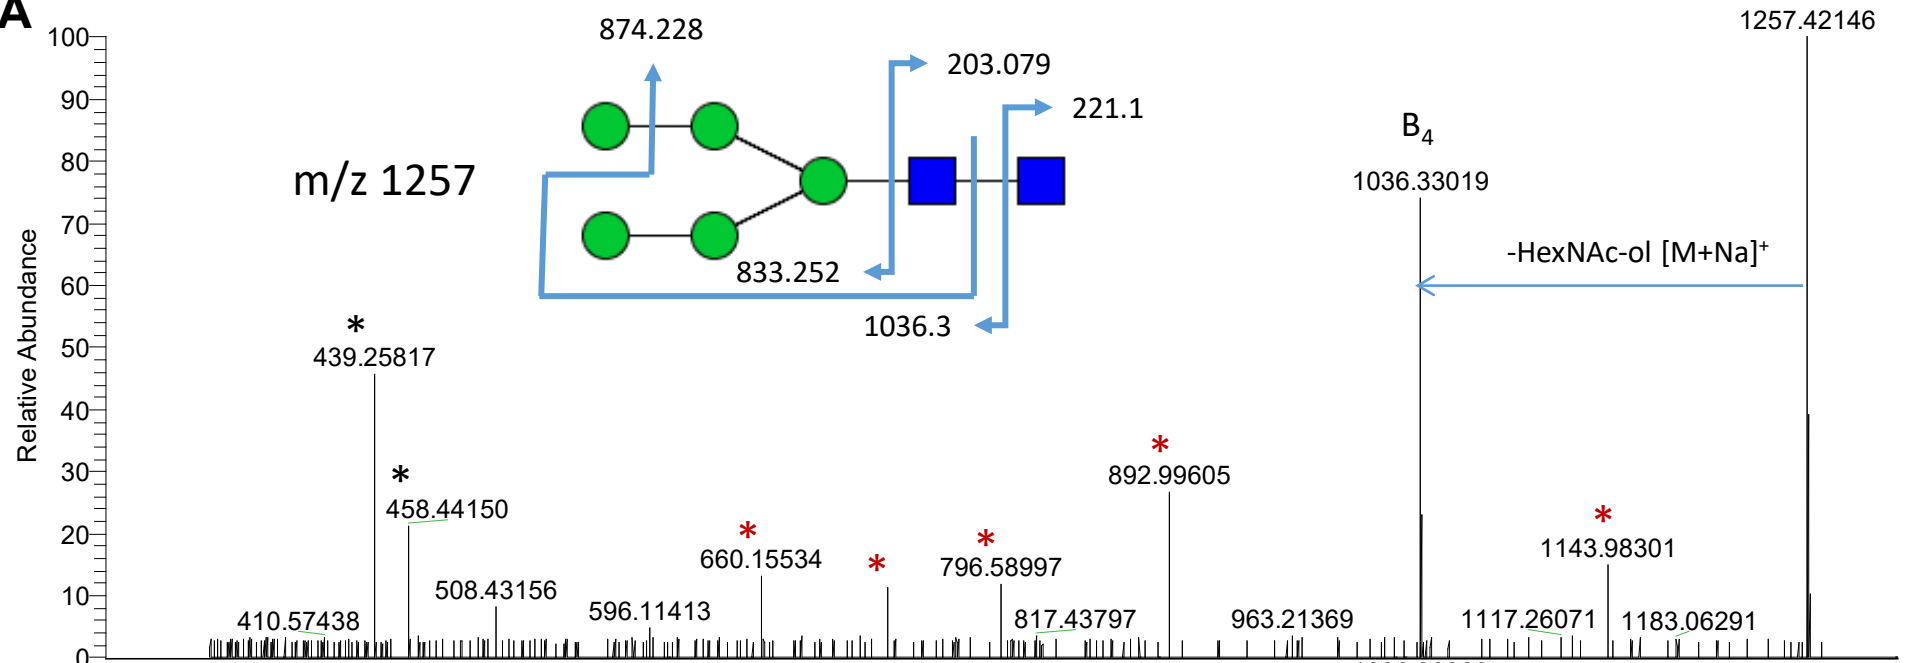

NL: 9.40E4  
1257\_T#1-10 RT: 0.00-1.24 AV:  
10 T: FTMS + p MALDI w Full ms2  
1257.43@cid0.00  
[345.00-1300.00]

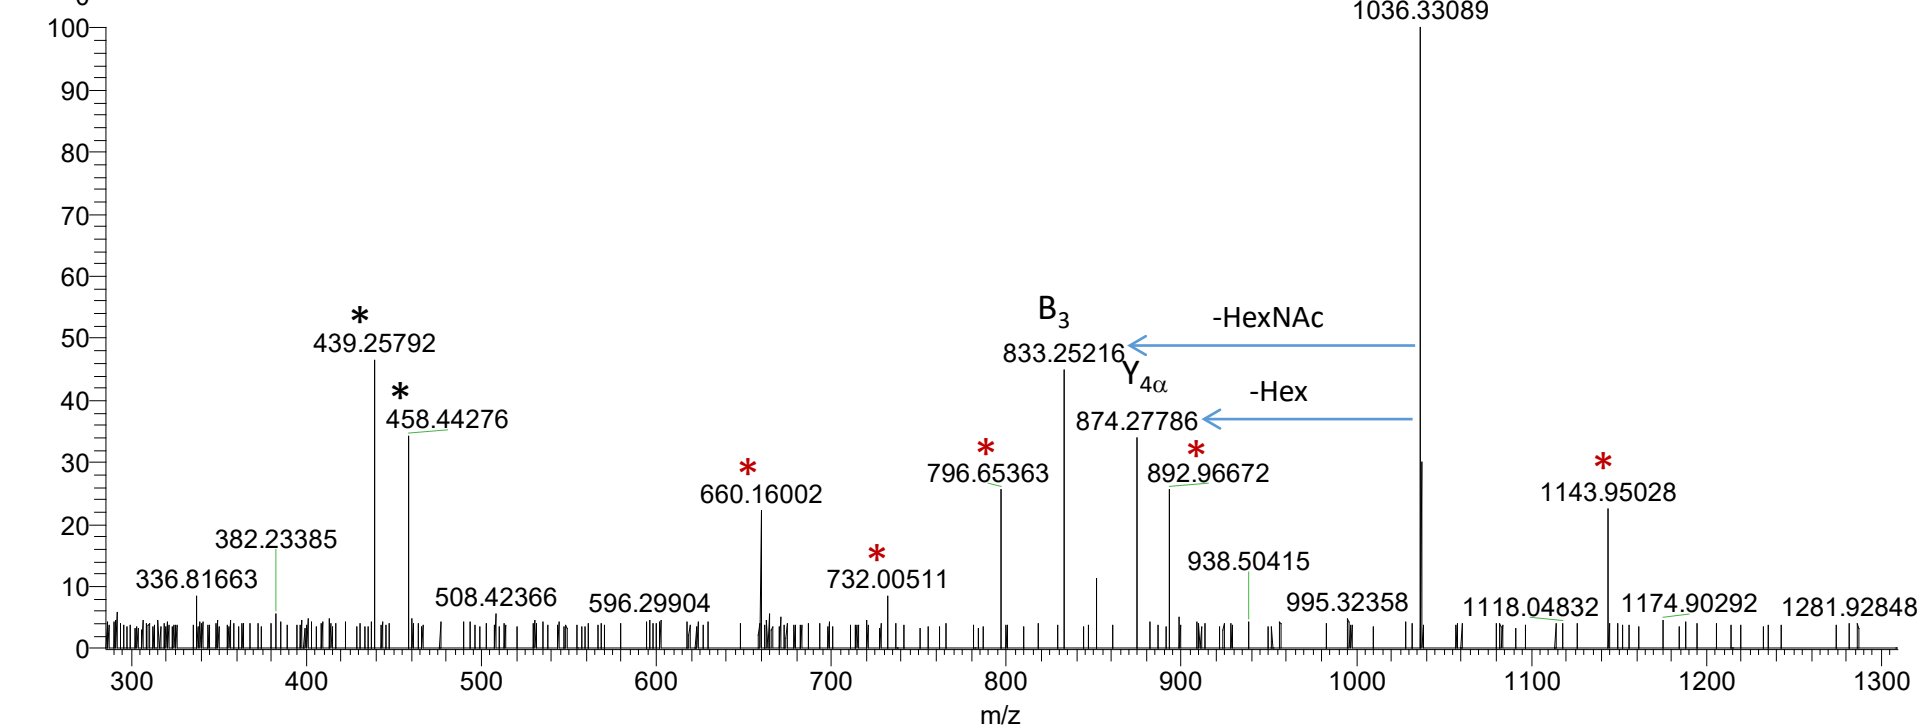

NL: 6.81E4  
1257\_1036\_ti\_180914135925#1-  
10 RT: 0.00-1.03 AV: 10 T: FTMS  
+ p MALDI w Full ms3  
1257.43@cid23.00  
1036.33@cid0.00  
[285.00-1300.00]

# SD 2B

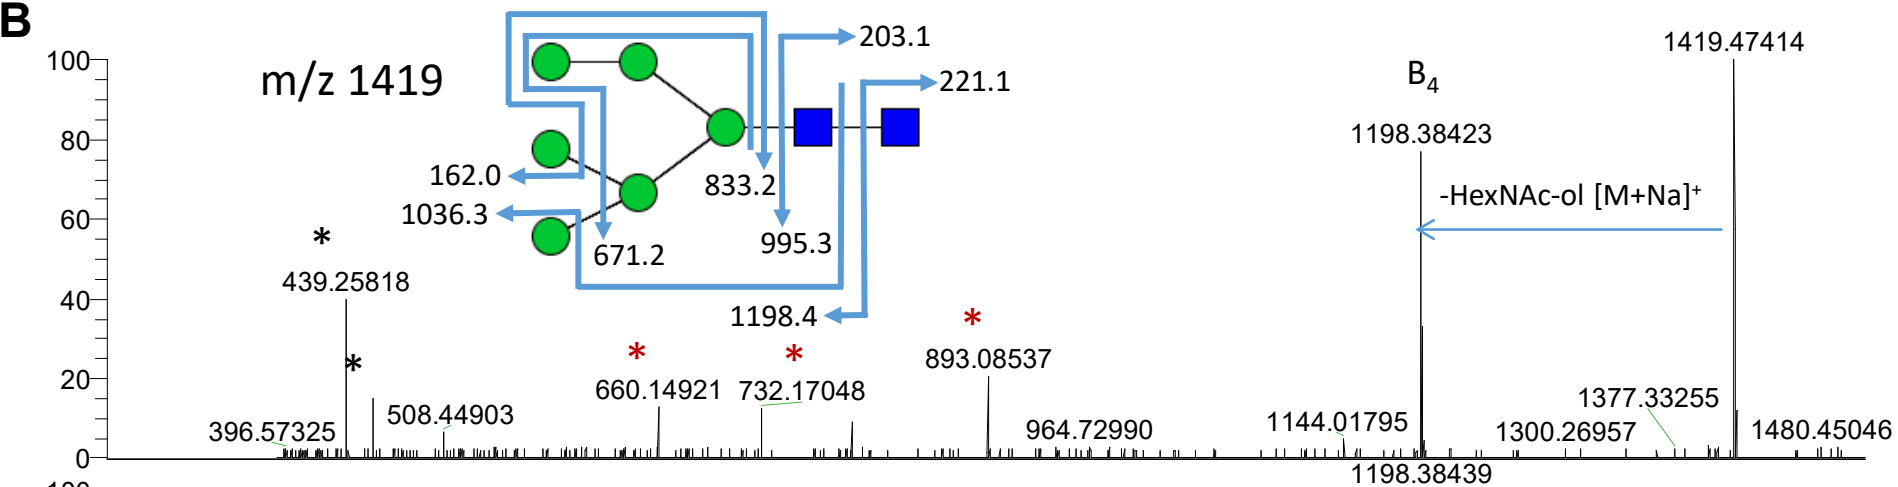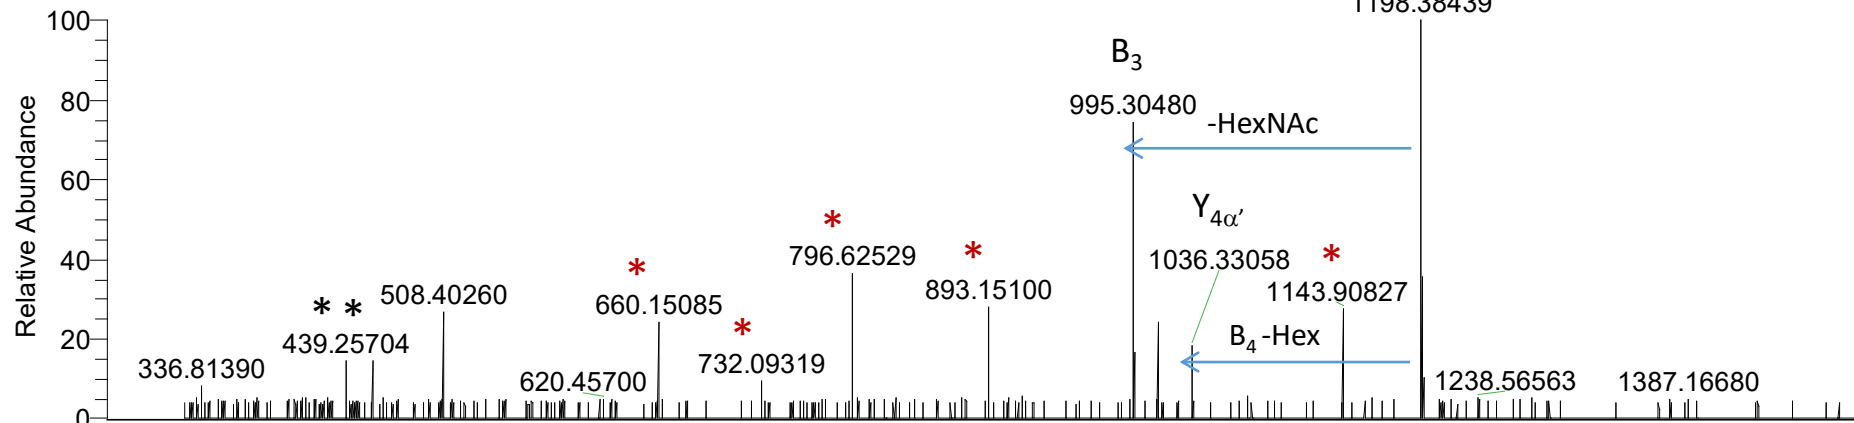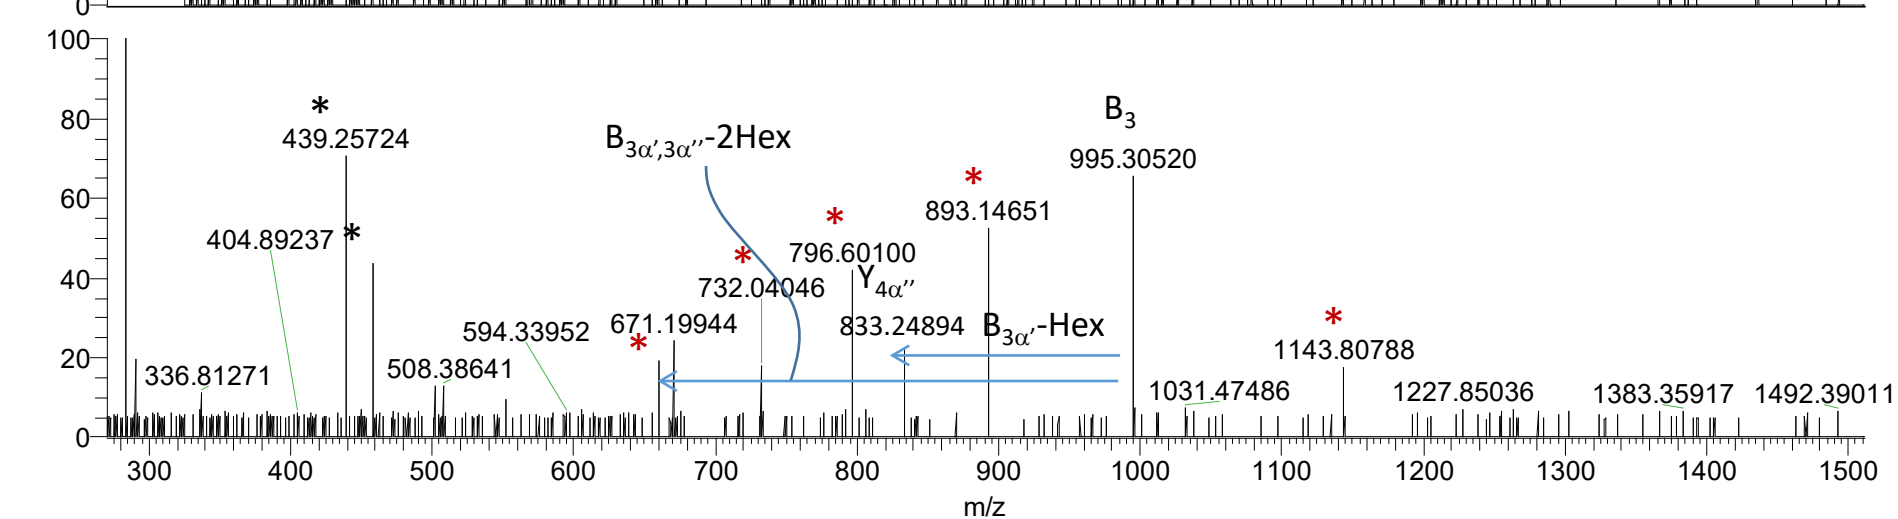

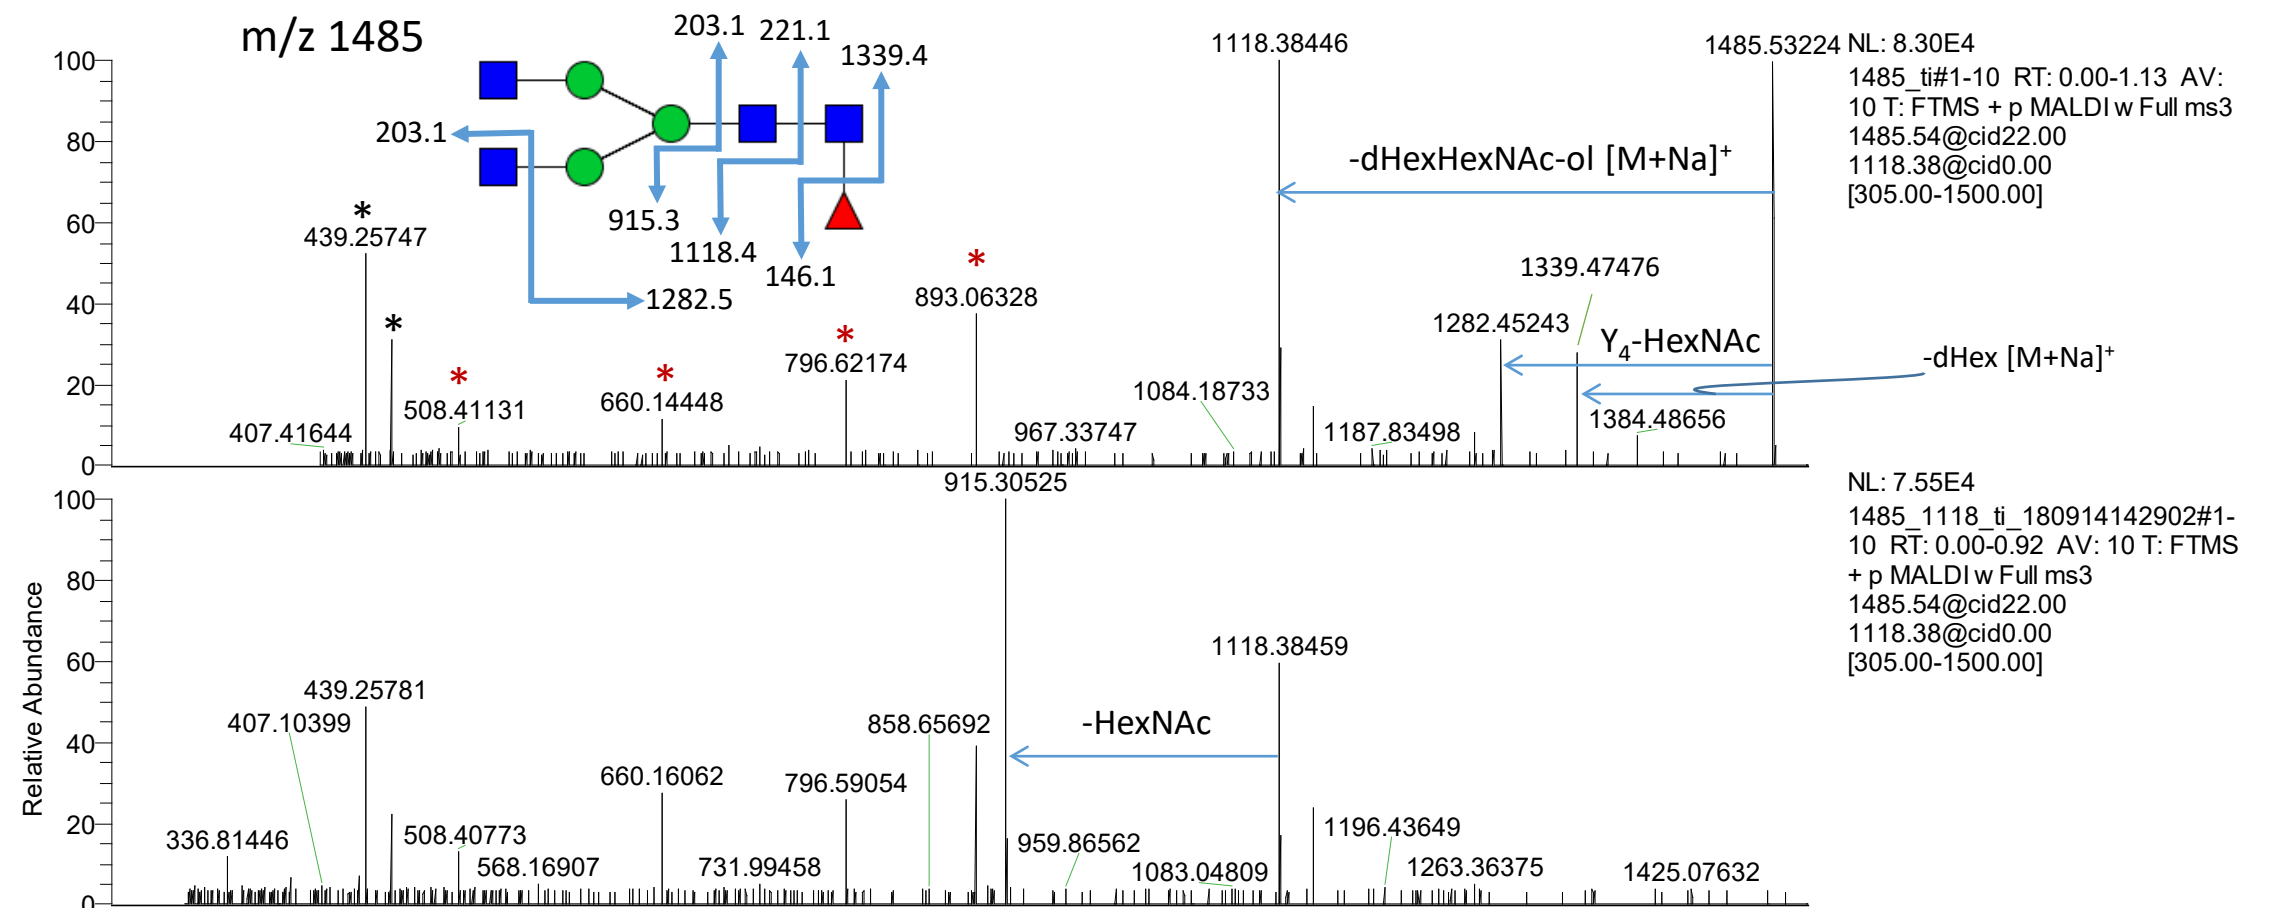



# SD 2D

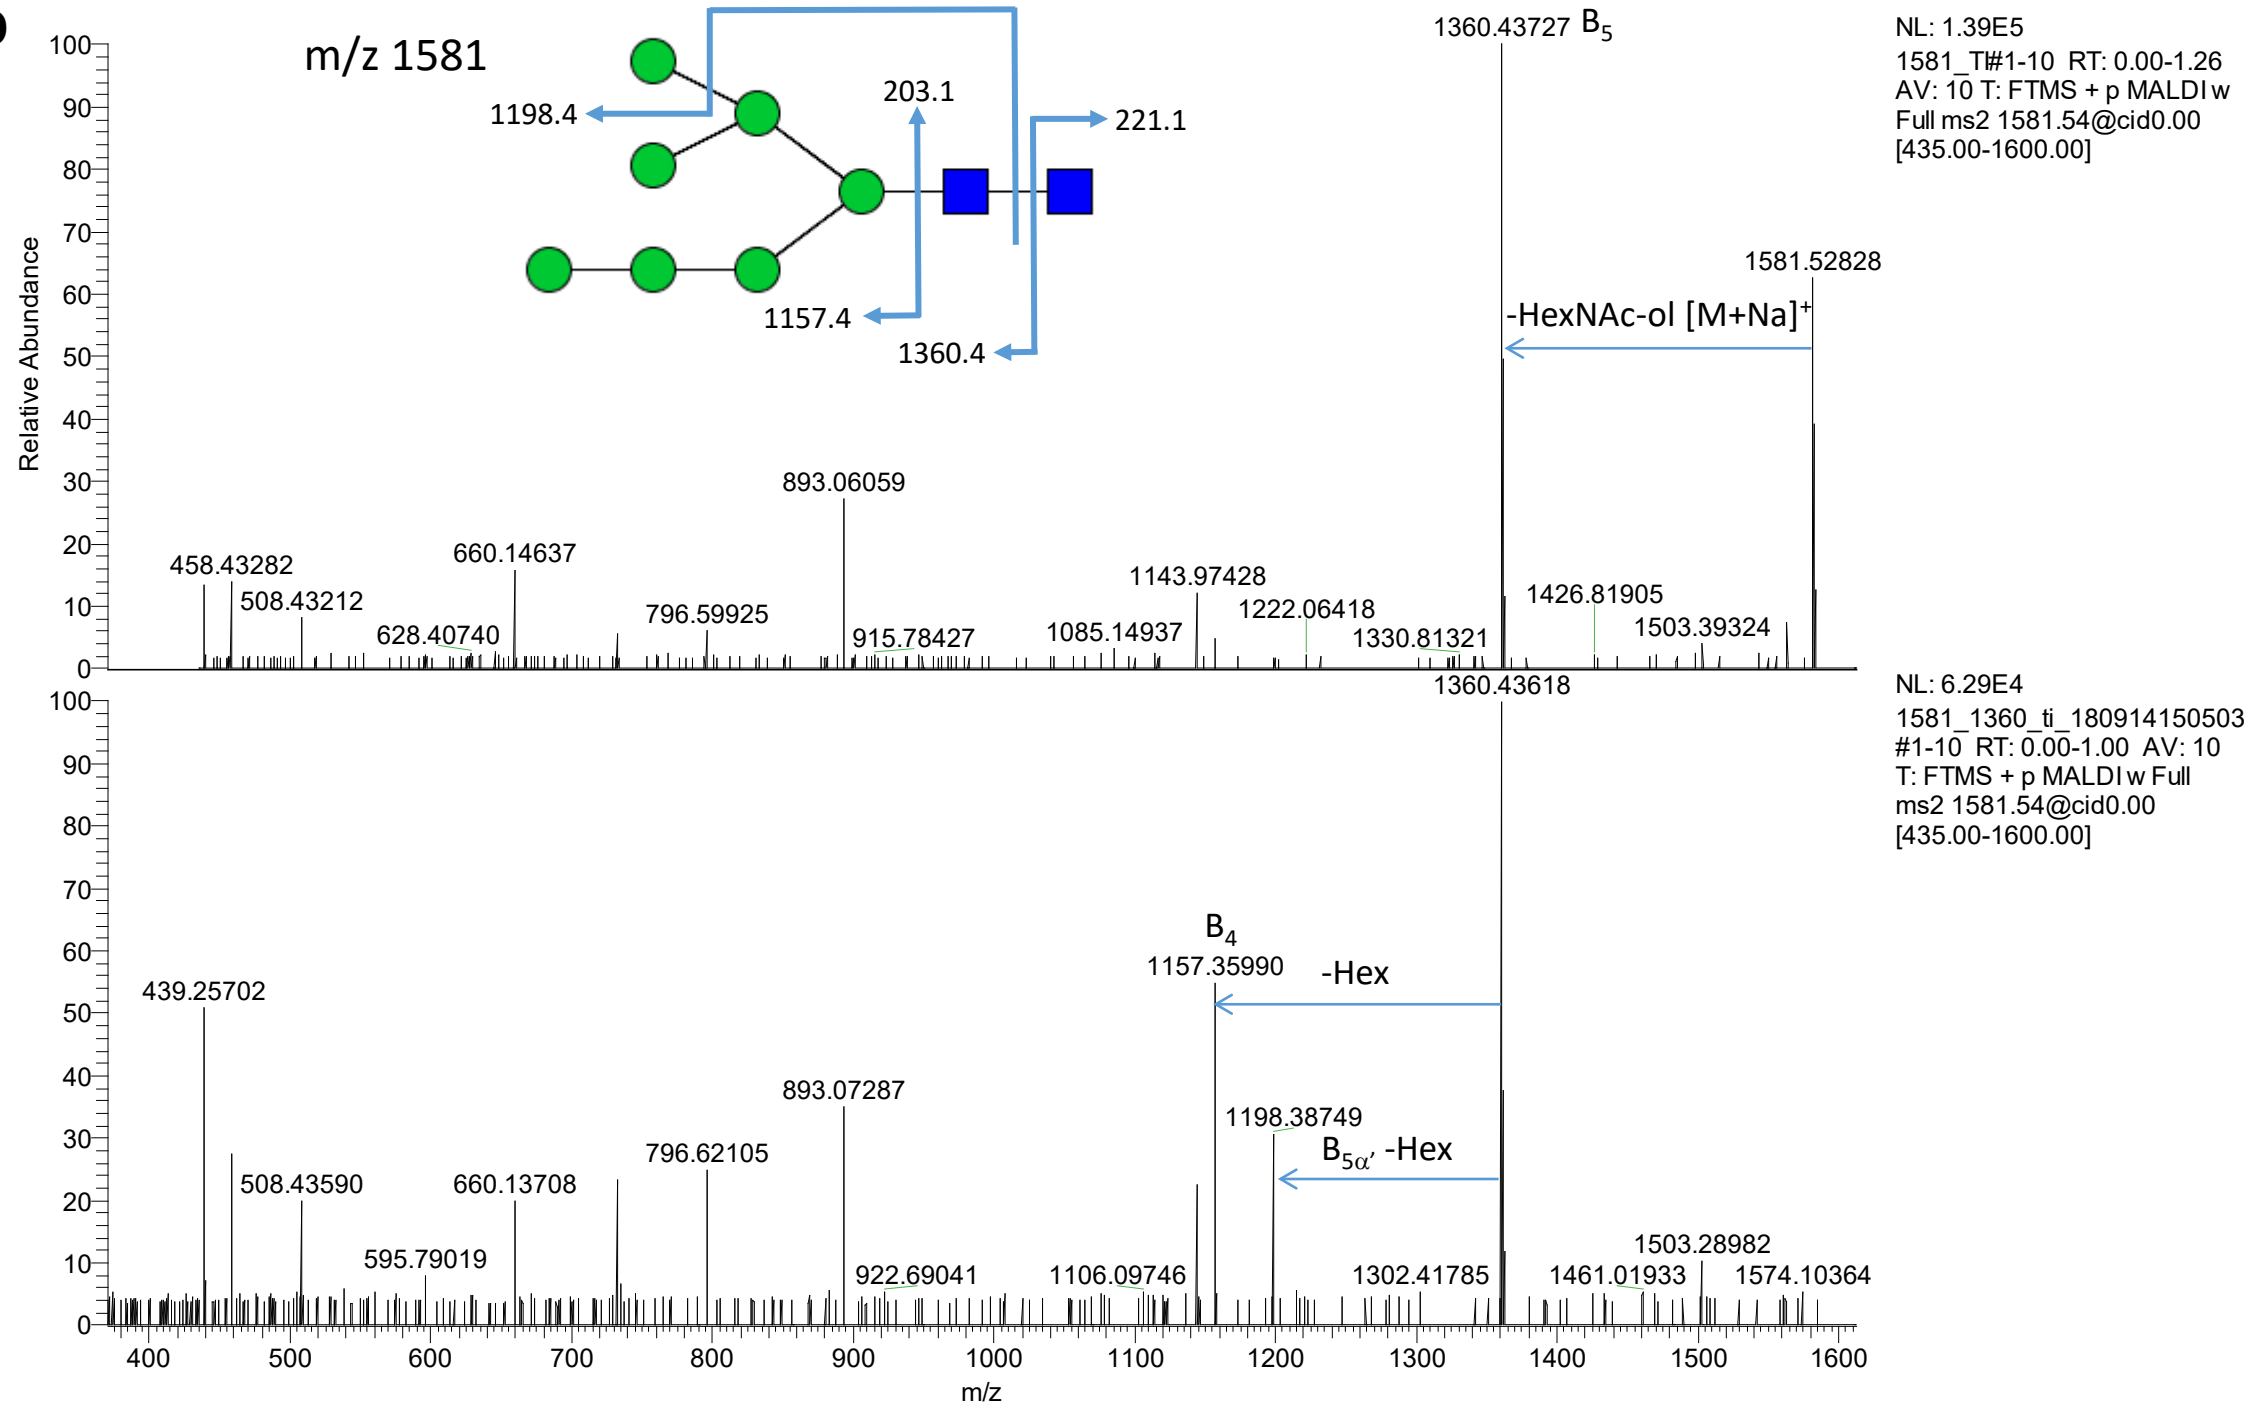

m/z 1647

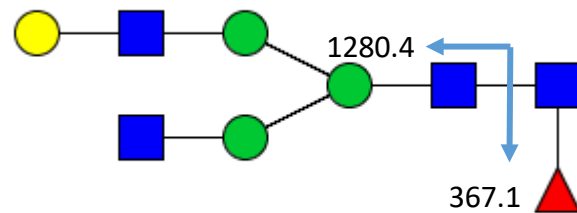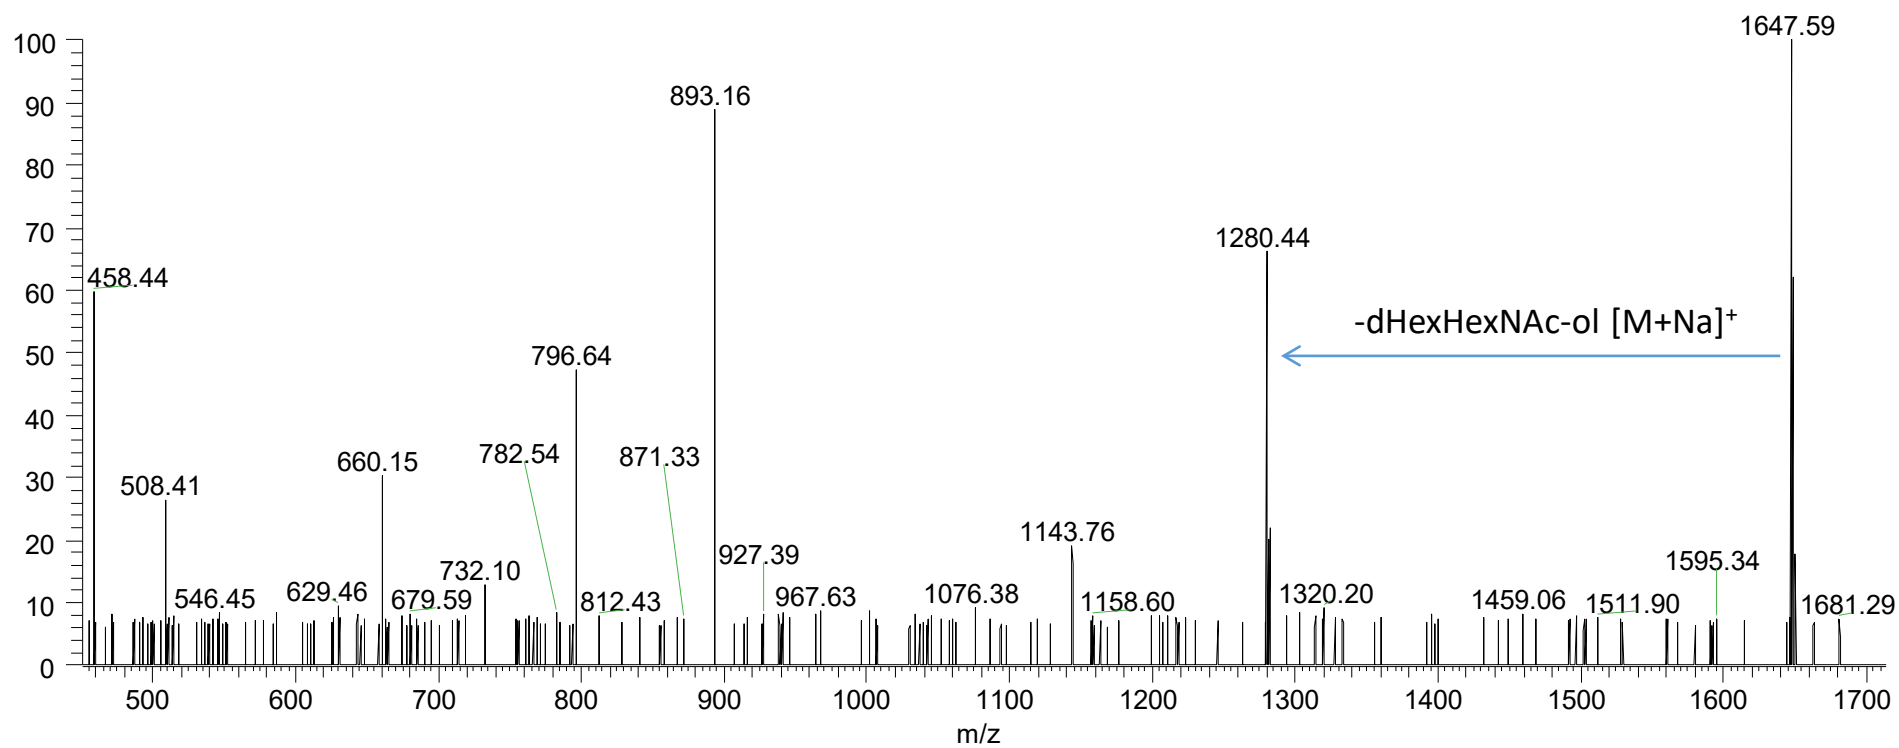

NL: 3.71E4  
1647\_TI#1-10 RT:  
0.00-1.47 AV: 10 T:  
FTMS + p MALDI w Full  
ms2 1647.59@cid0.00  
[450.00-1700.00]

# SD 2F

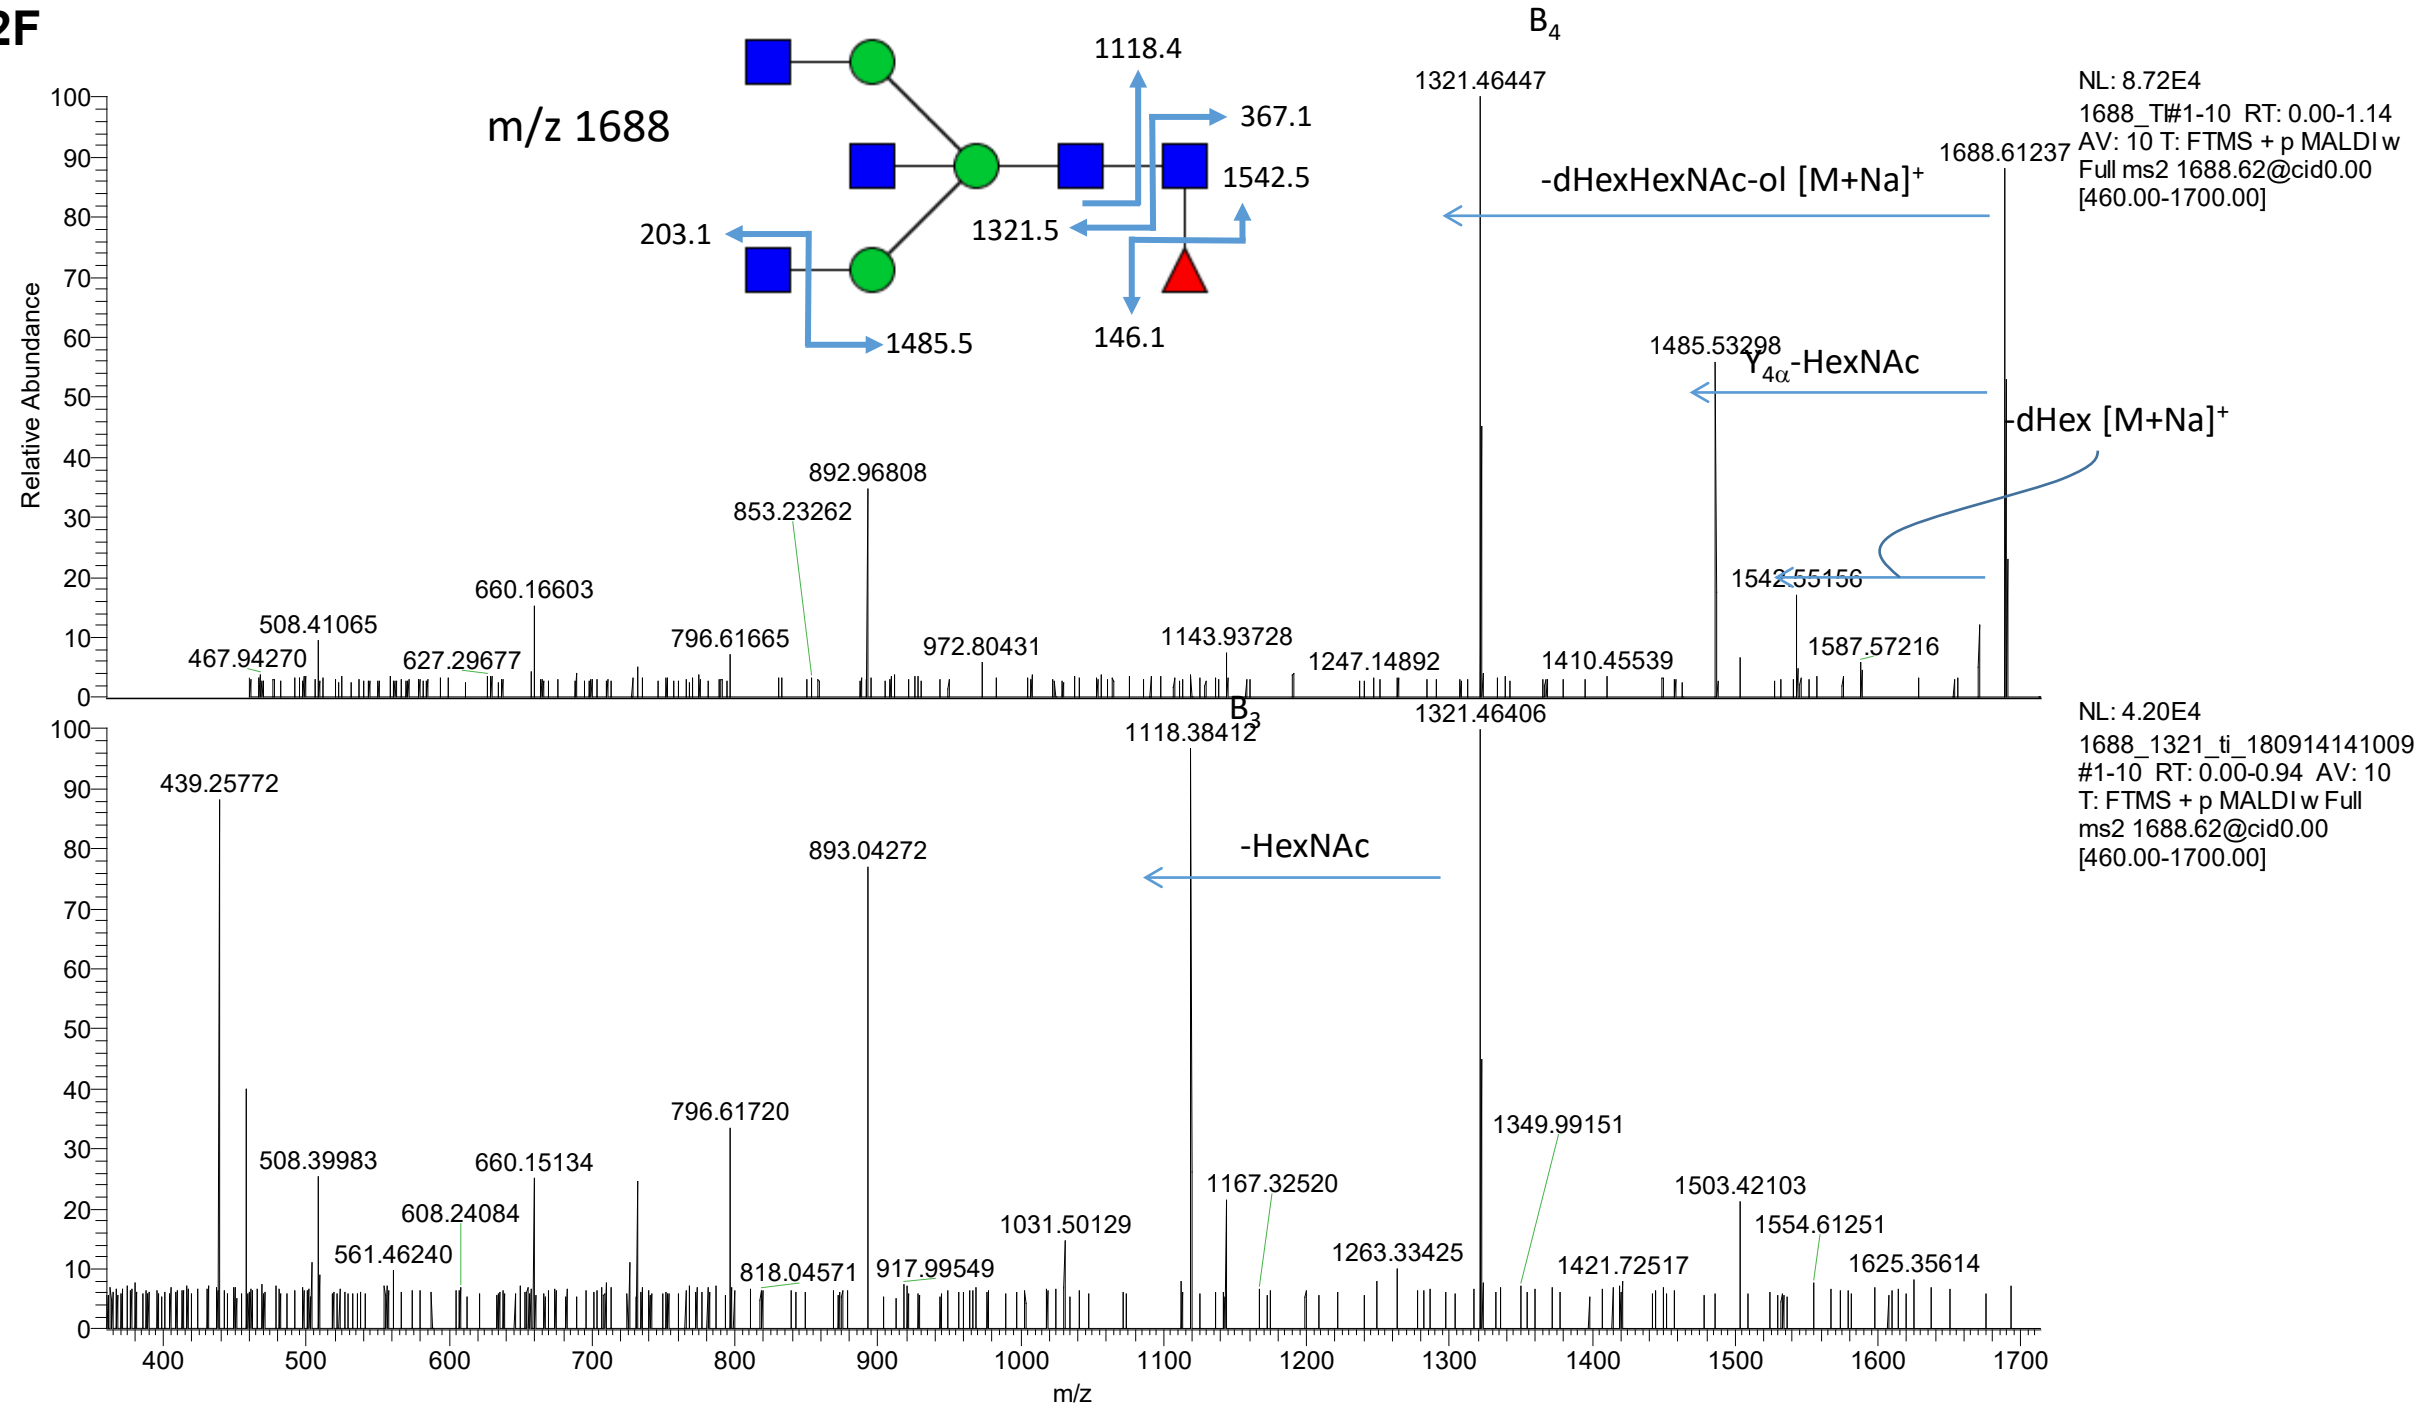

# SD 2G

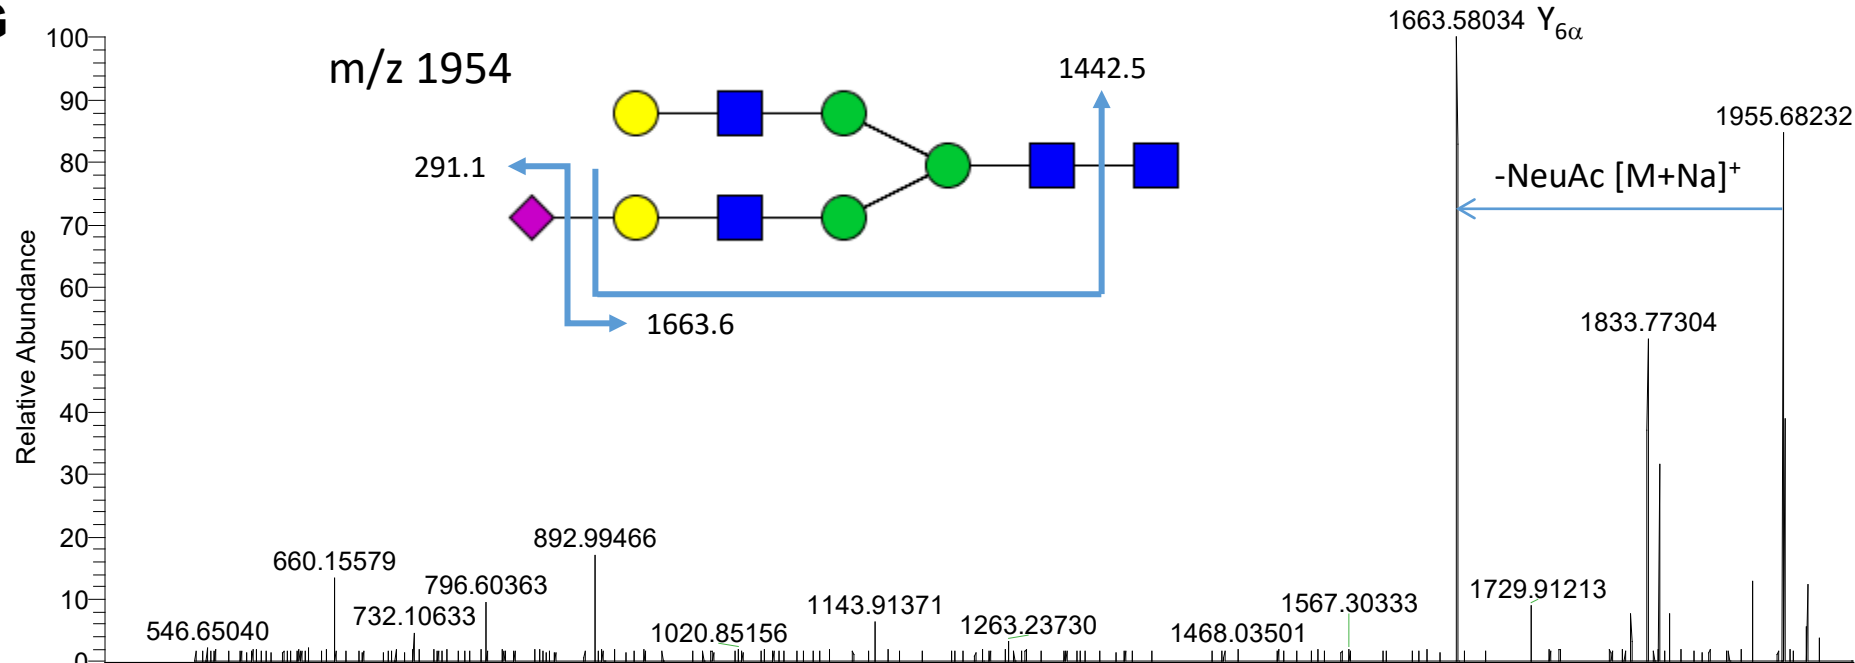

NL: 1.55E5  
1954\_T#1-10 RT: 0.00-1.02  
AV: 10 T: FTMS + p MALDI w  
Full ms2 1954.68@cid0.00  
[535.00-2000.00]

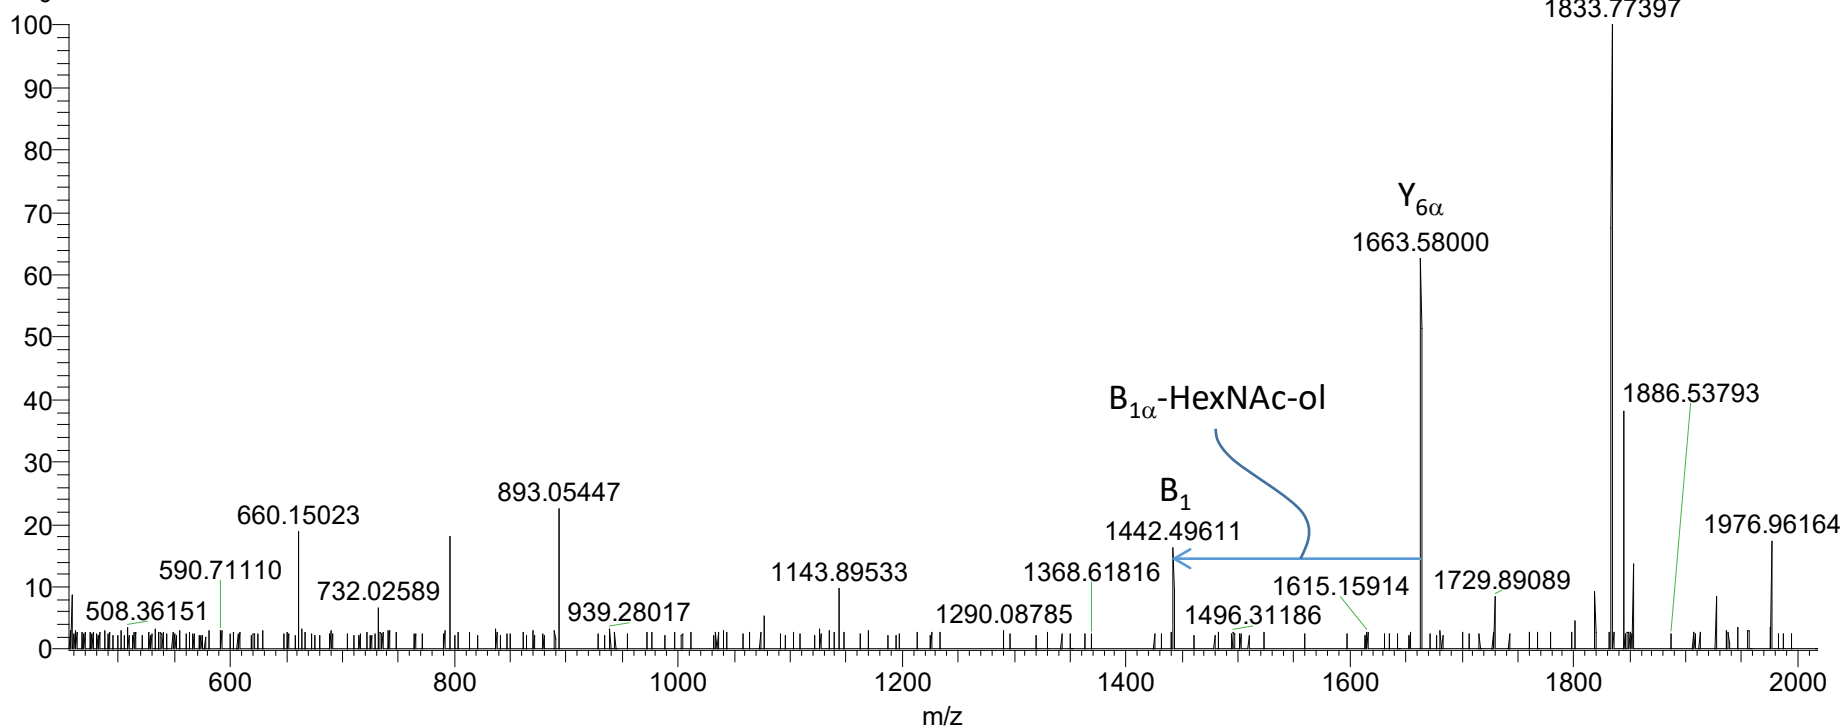

NL: 1.05E5  
1954\_1663\_ti\_180914141911  
#1-10 RT: 0.00-1.16 AV: 10  
T: FTMS + p MALDI w Full  
ms2 1954.68@cid0.00  
[535.00-2000.00]

# SD 2H

m/z 1970

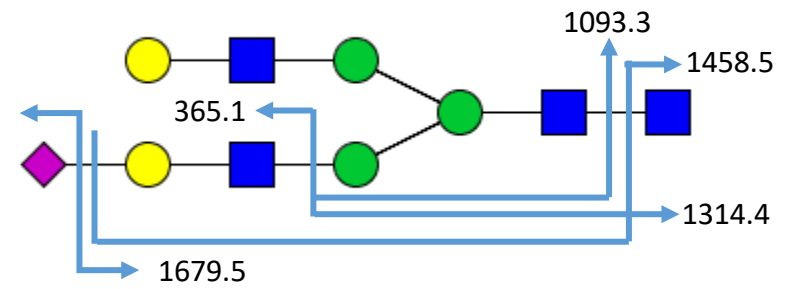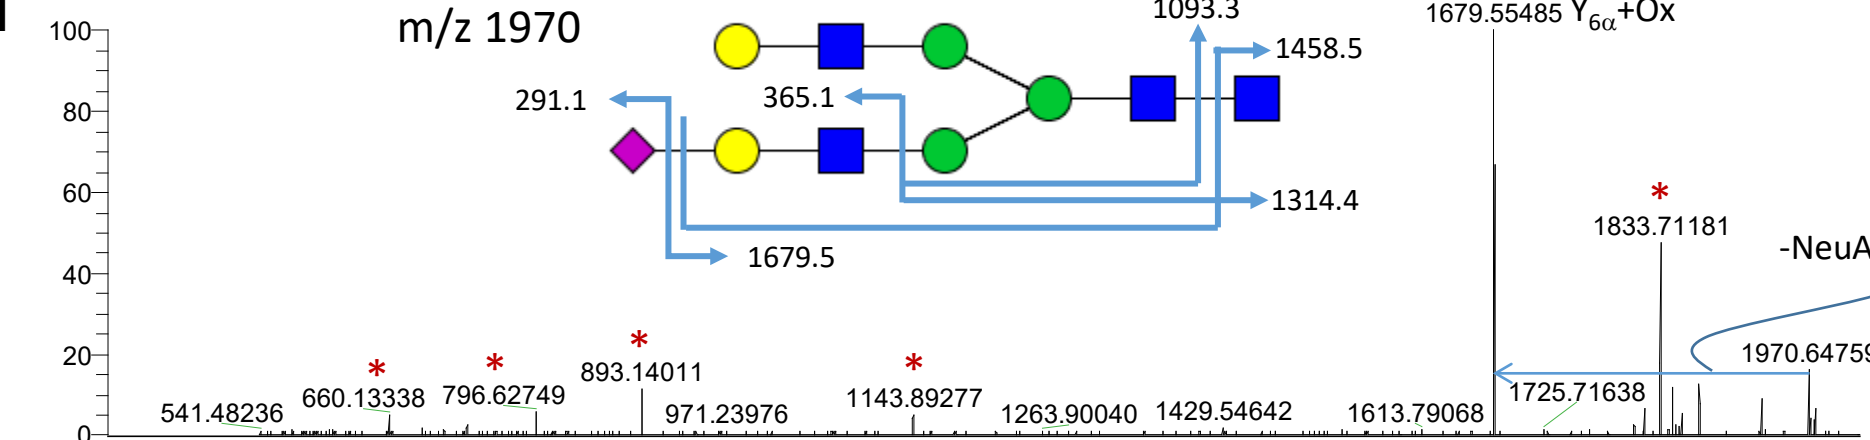

NL: 2.66E5  
 1970test\_TI\_180914161345#  
 1-10 RT: 0.00-1.10 AV: 10 T:  
 FTMS + p MALDI w Full ms2  
 1970.66@cid0.00  
 [540.00-2000.00]

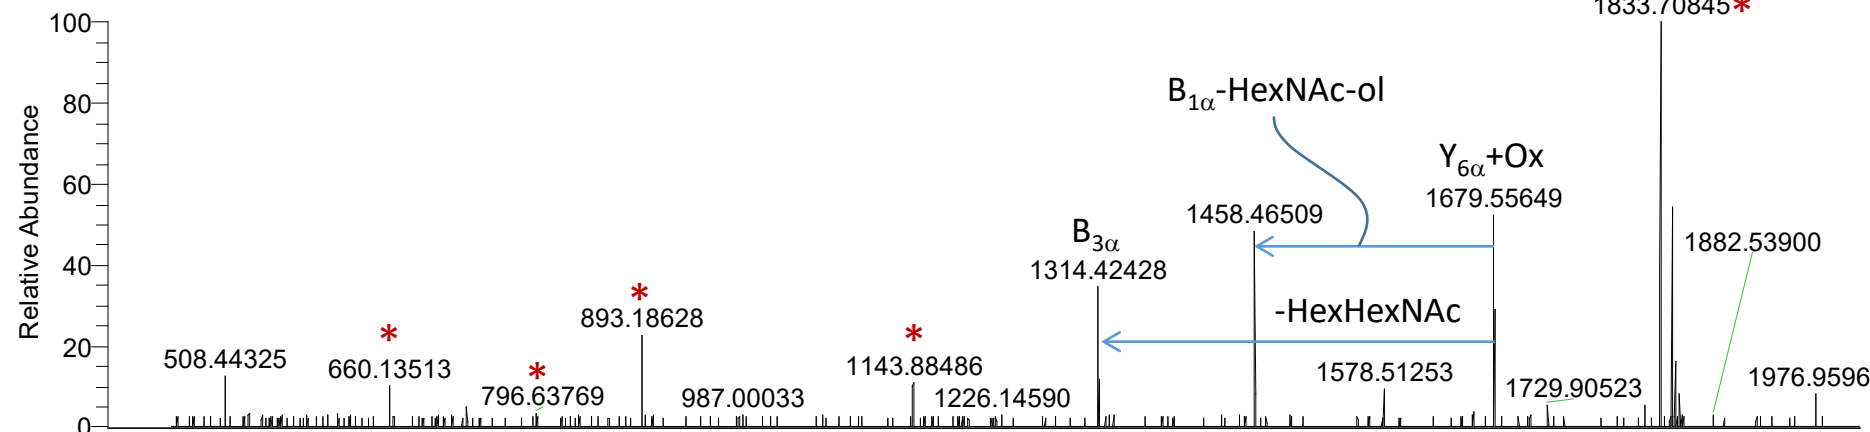

NL: 1.07E5  
 1970test\_1679\_ti#1-10 RT:  
 0.00-1.10 AV: 10 T: FTMS +  
 p MALDI w Full ms2  
 1970.66@cid0.00  
 [540.00-2000.00]

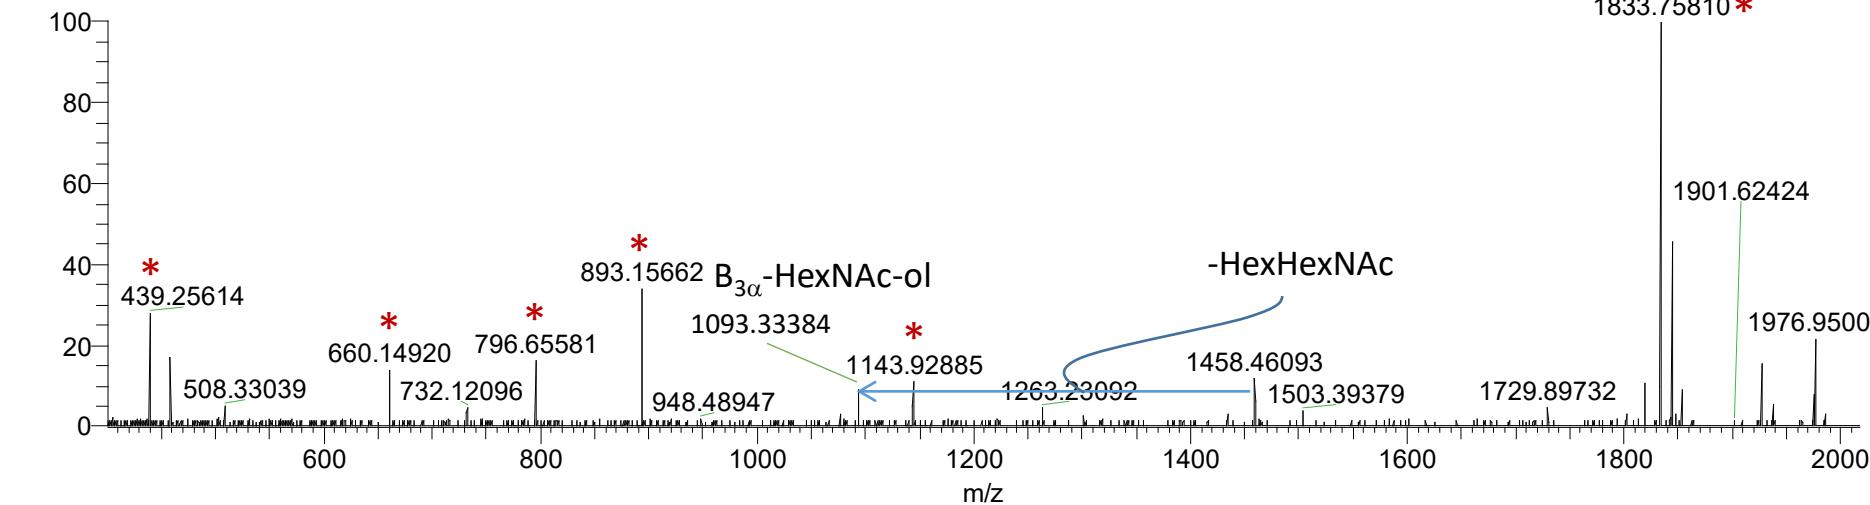

NL: 9.77E4  
 1970test\_1679\_1458\_ti#1-20  
 RT: 0.00-2.23 AV: 20 T:  
 FTMS + p MALDI w Full ms2  
 1970.66@cid0.00  
 [540.00-2000.00]

# SD 21

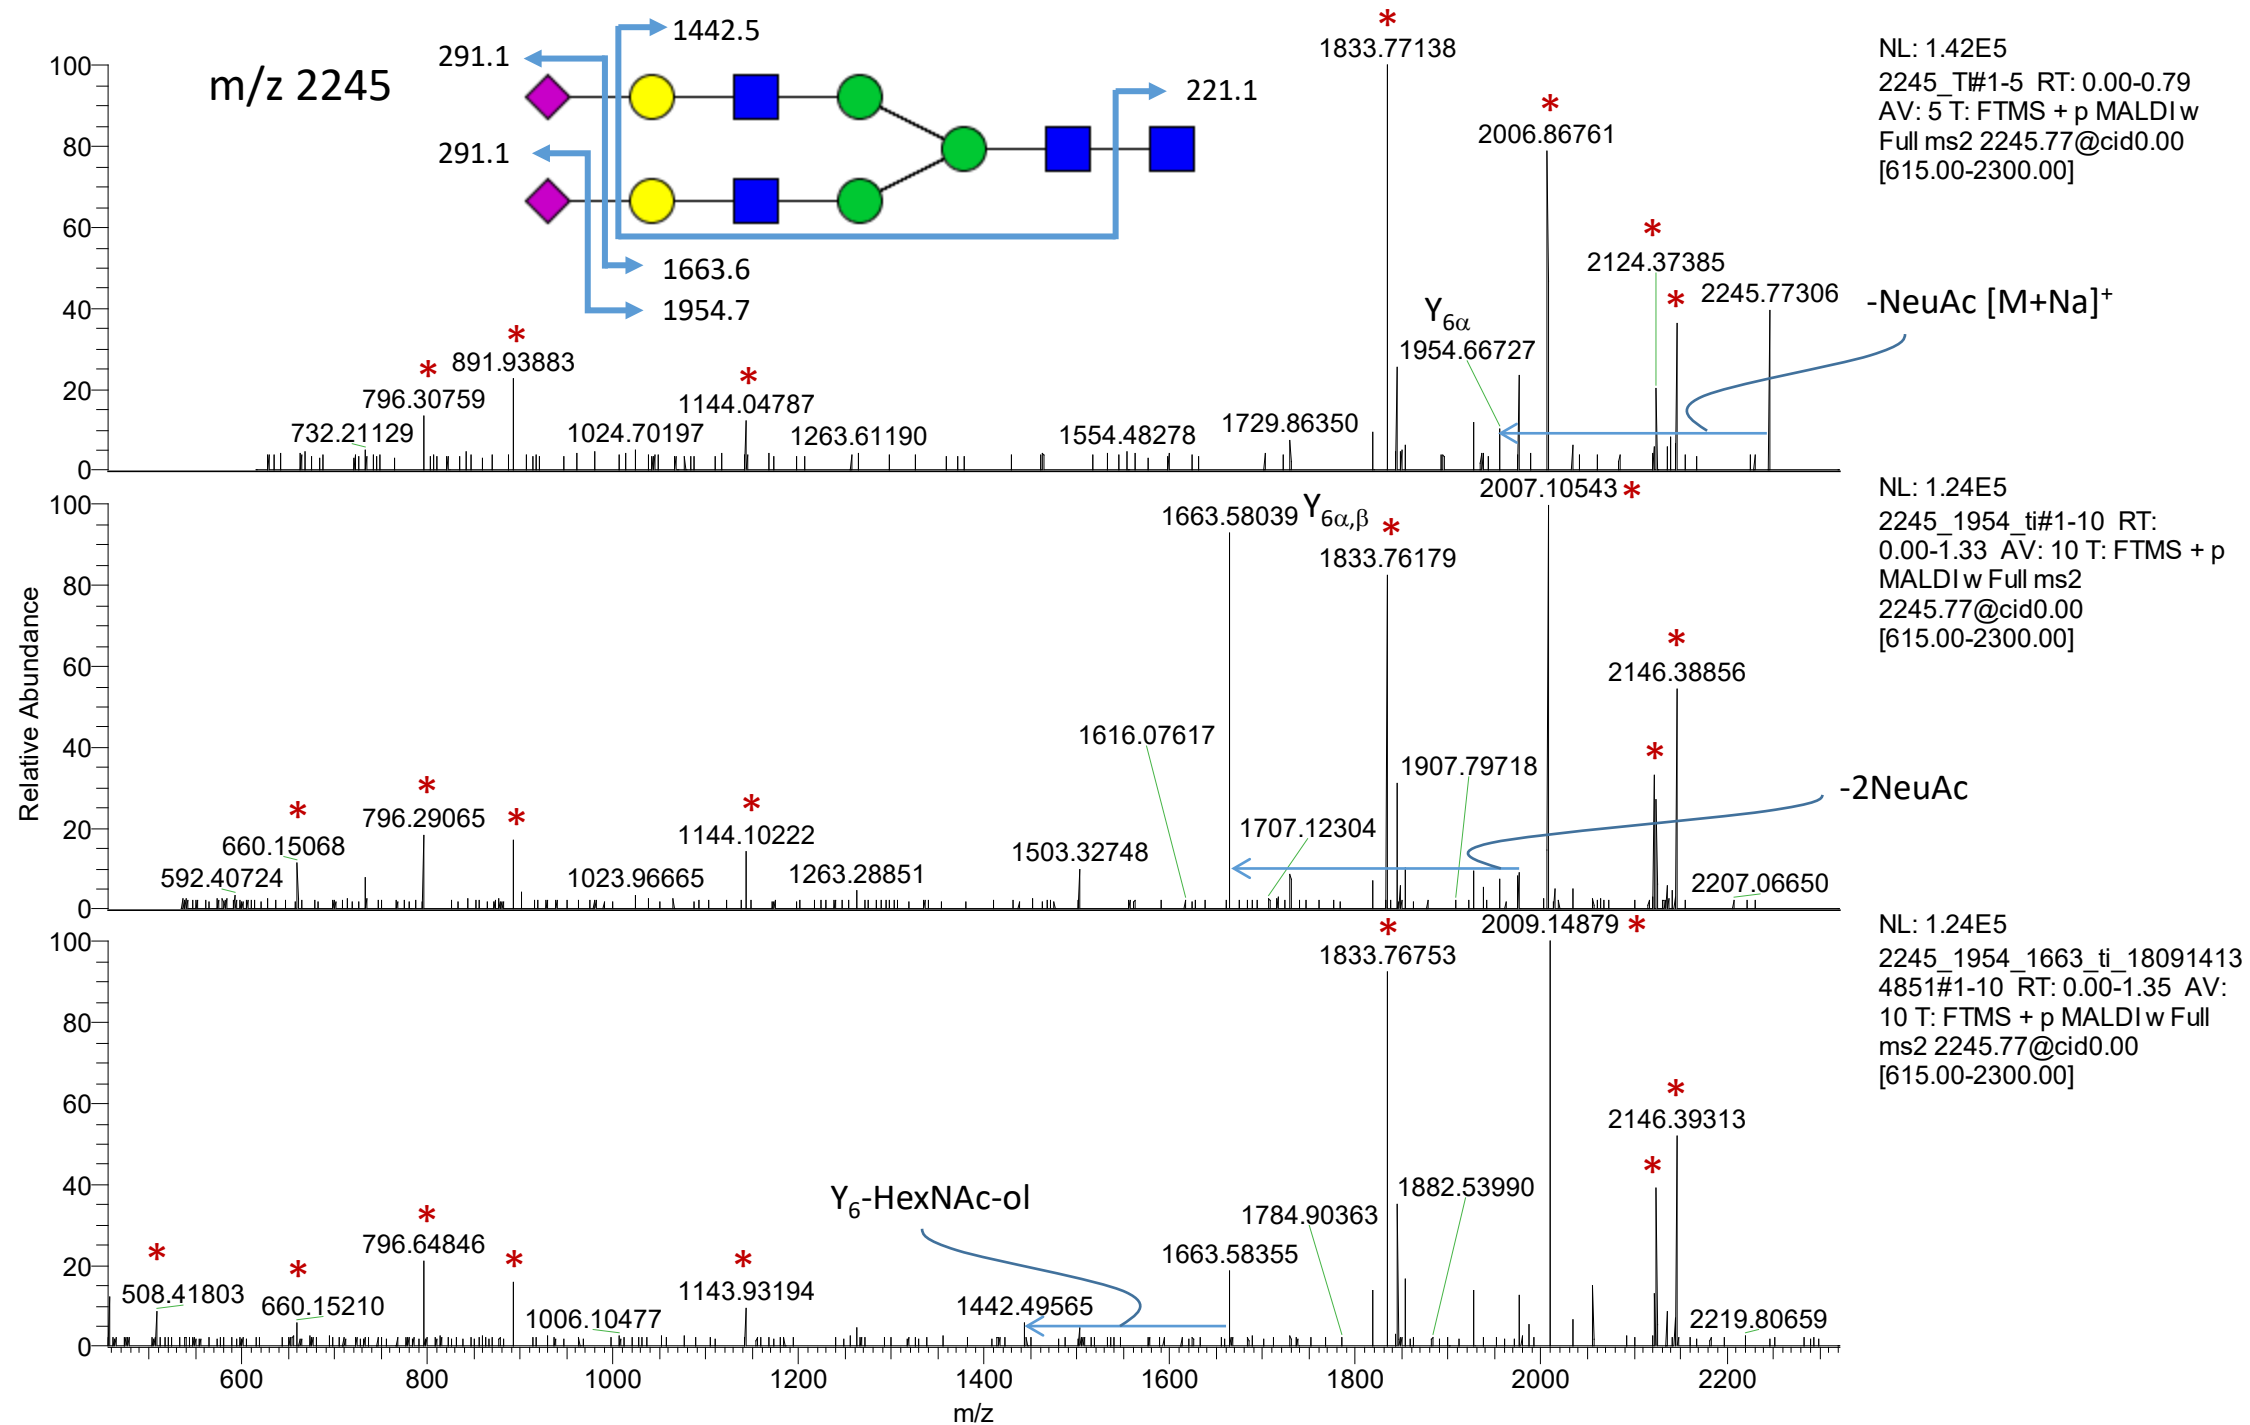

# SD 2J

m/z 1825

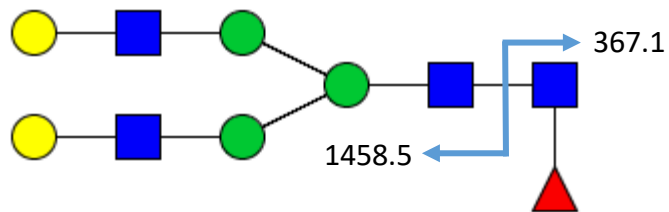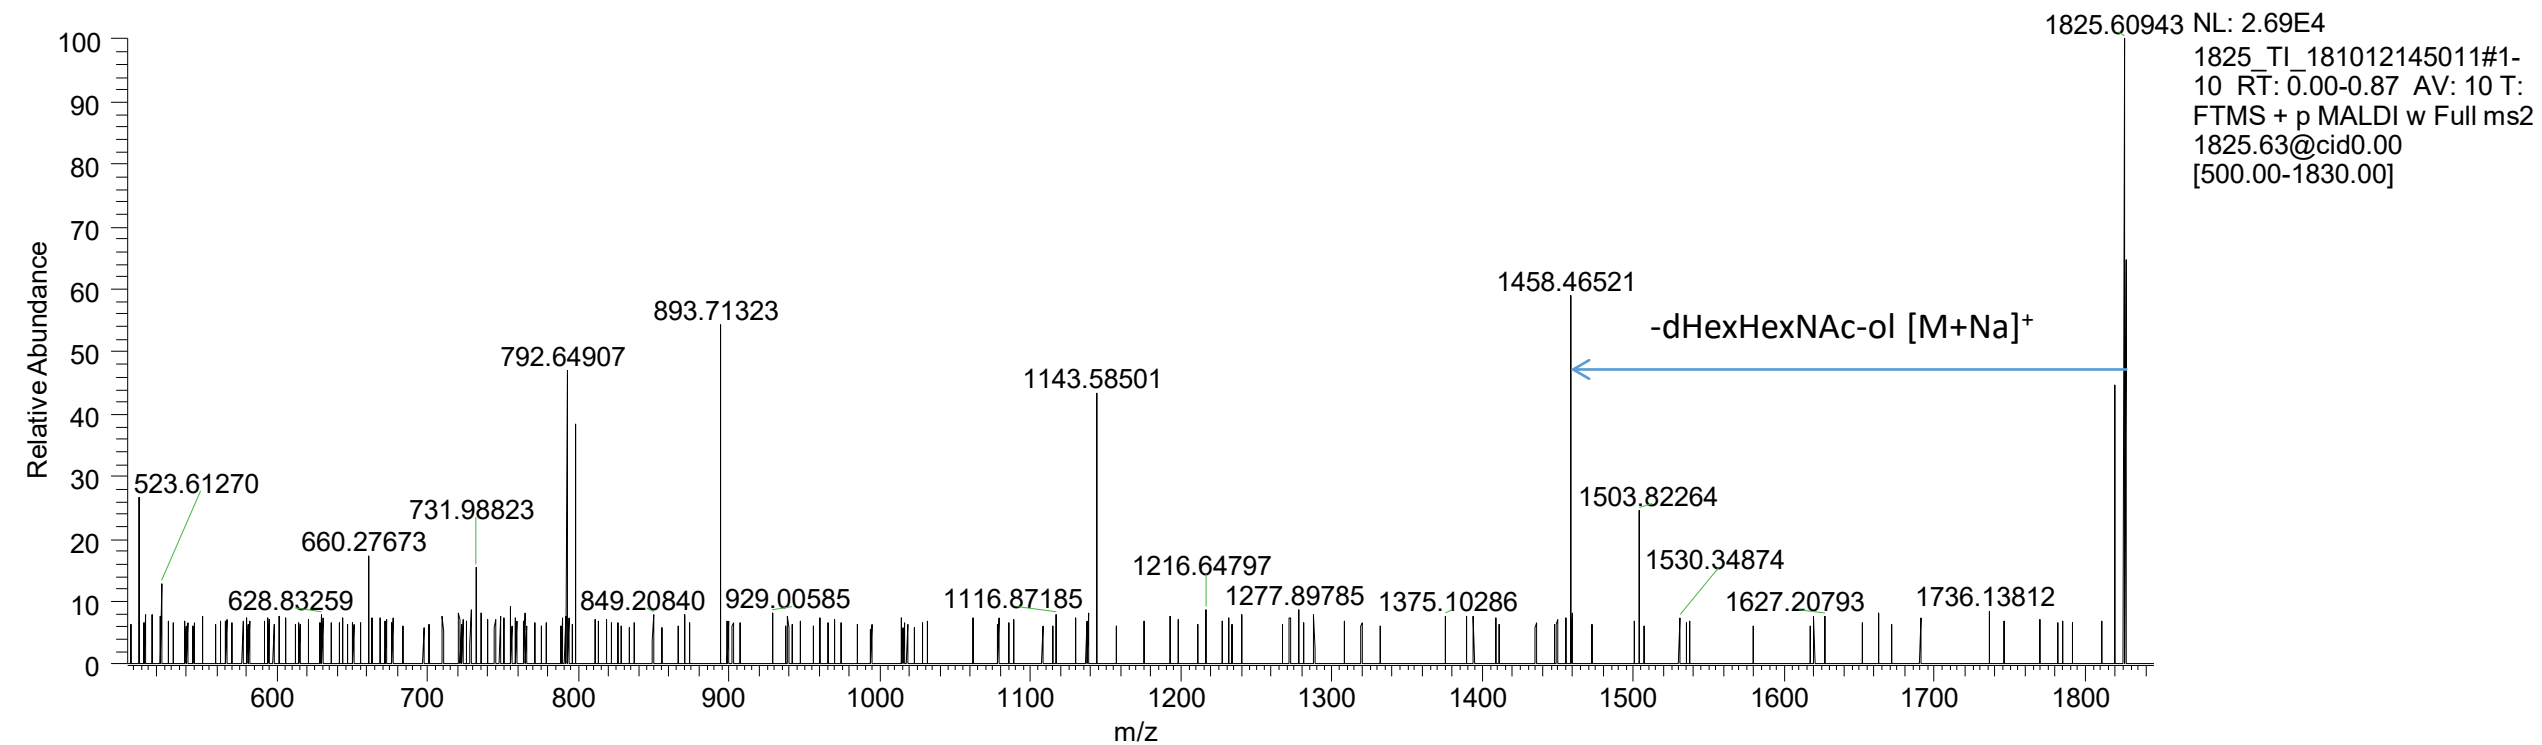

# SD 2K

m/z 1866

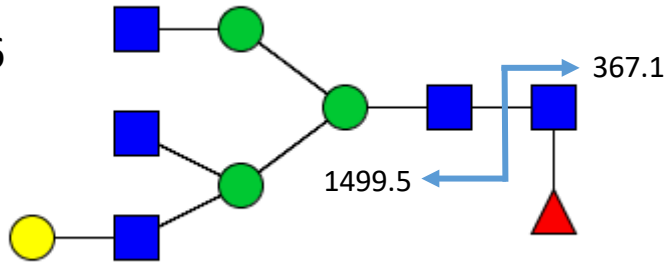

or

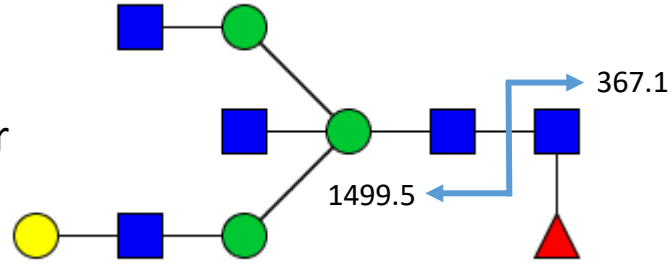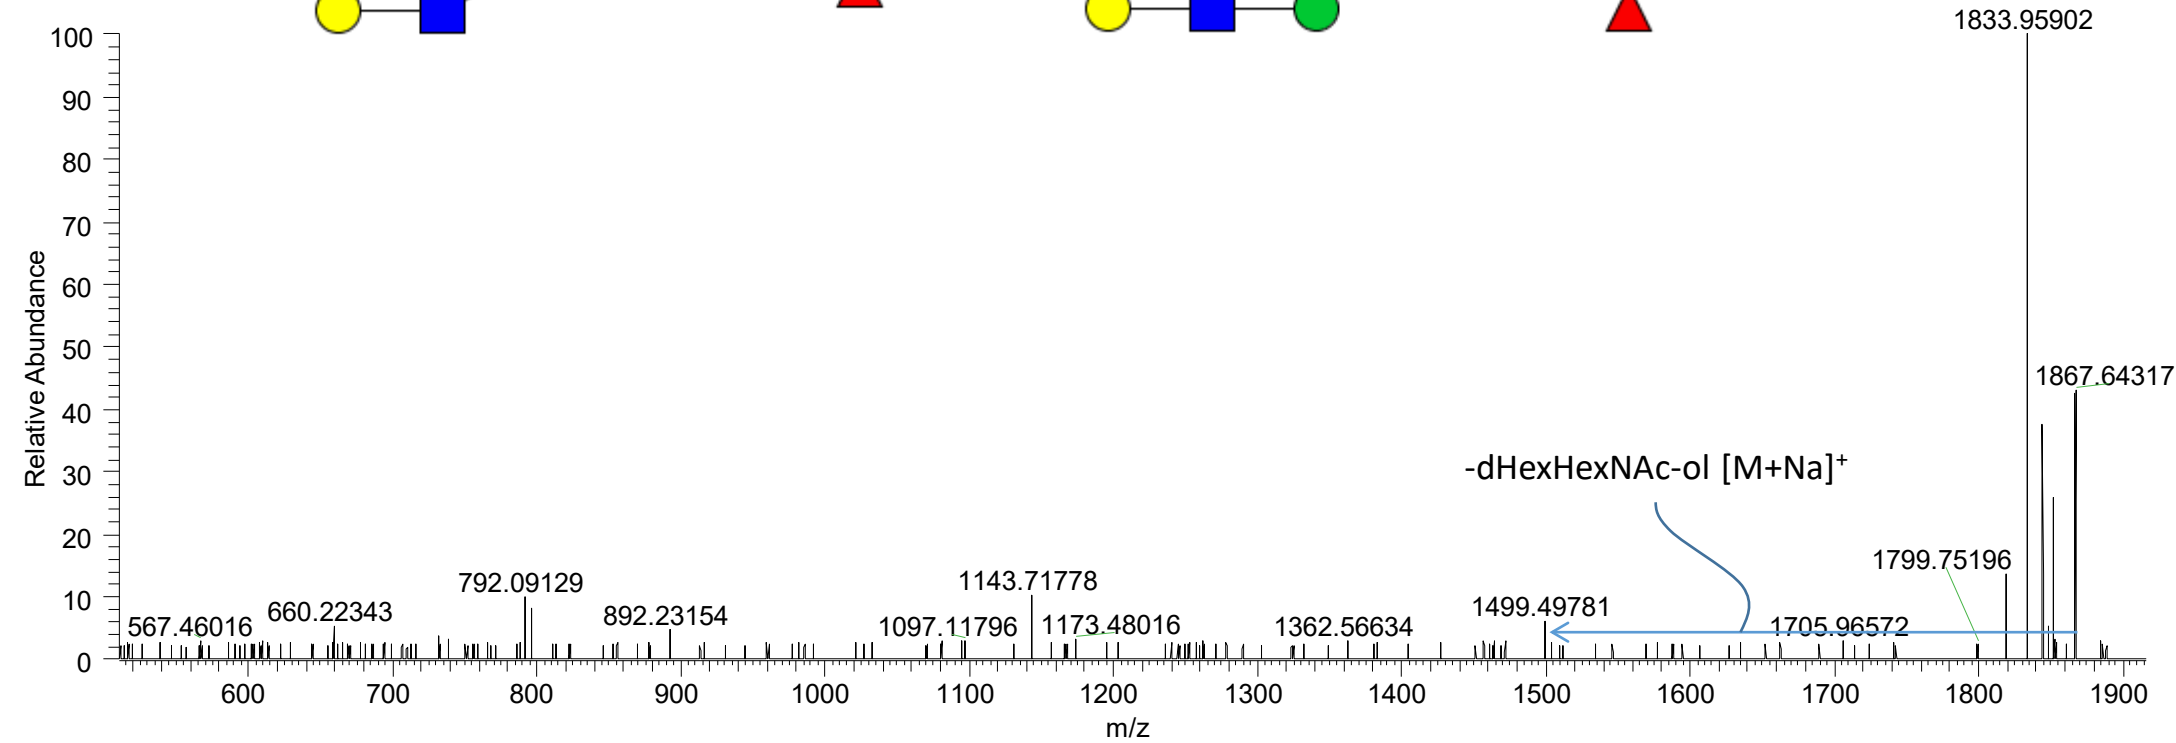

NL: 7.61E4  
1866\_TI\_181012111748#1-  
10 RT: 0.00-1.28 AV: 10 T:  
FTMS + p MALDI w Full ms2  
1866.66@cid0.00  
[510.00-1900.00]



# SD 2L

m/z 2012

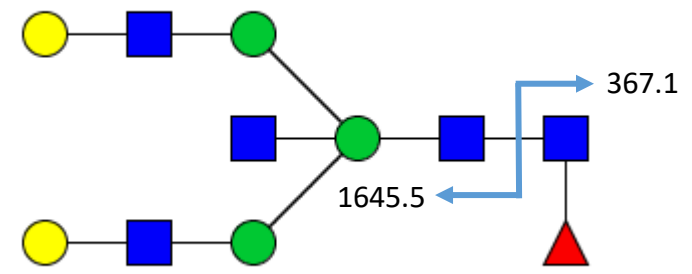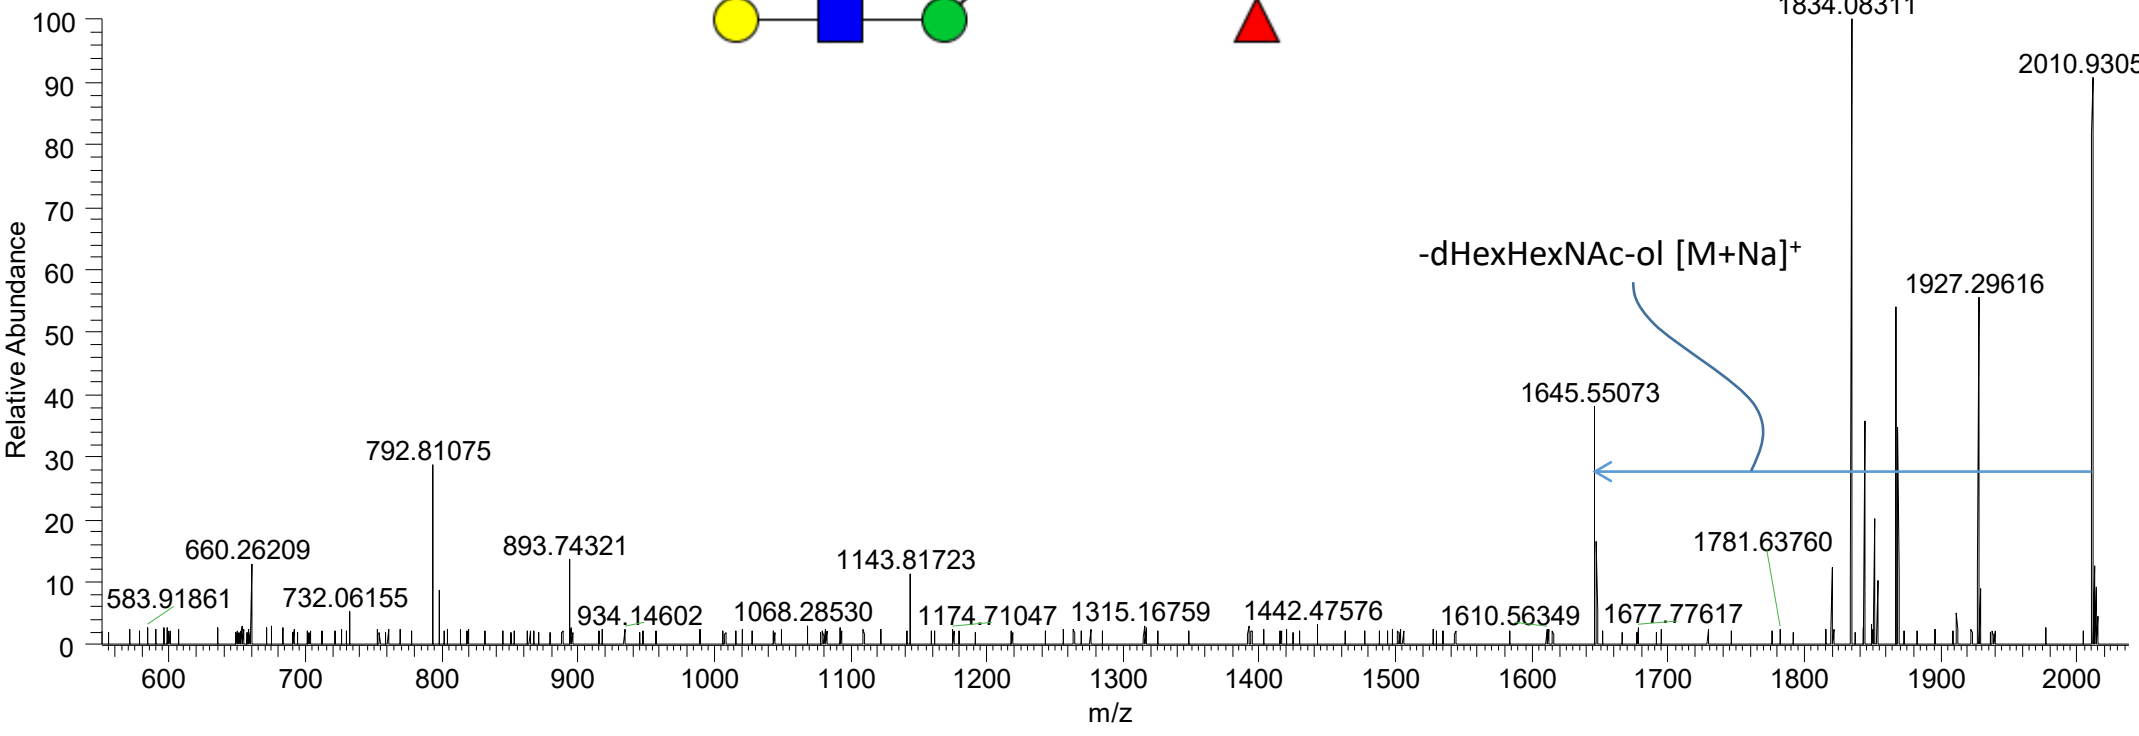

-dHexHexNAc-ol [M+Na]<sup>+</sup>

NL: 8.28E4  
2012\_TI\_181012151136#1-  
10 RT: 0.00-1.08 AV: 10 T:  
FTMS + p MALDI w Full ms2  
2012.72@cid0.00  
[550.00-2020.00]

**Supplementary Data 4. Lectin staining.** Using a Dako delimiting pen (Agilent Technologies, Santa Clara, CA), dams were created around tissue sections. The sections were then incubated in 1% BSA (w/v) in approximately 300  $\mu$ L of PBS for 30 min at room temperature, then incubated in 10  $\mu$ g/mL of SNA lectin for 2 h. They were then rinsed for 10 min three times with 1% BSA in PBS. The sections were then incubated in approximately 300  $\mu$ L of DAPI for 20 min and rinsed with PBS for 5 min. Finally, two drops of Vectashield fluorescence mounting medium (Dako, Agilent Technologies) was added and the sections were cover-slipped and sealed with nail polish. Confocal images were obtained using a fluorescence microscope (Leica Biosystems). Adjacent tissue sections incubated in 1% BSA in PBS served as controls. Zeiss LSM700 confocal microscope connected to a Zeiss Axiovert 200 M with an EC Plan-Neofluar 40x/1.30 numerical aperture oil immersion objective (Carl Zeiss AG, Oberkochen, Germany). Processing of the images was performed using Zen software and applied on the entire images as well as on controls. Scale bar = 100  $\mu$ m. Related to Figure 2.

SD 4A

VH14-0622

Glioblastoma (Grade IV WHO)

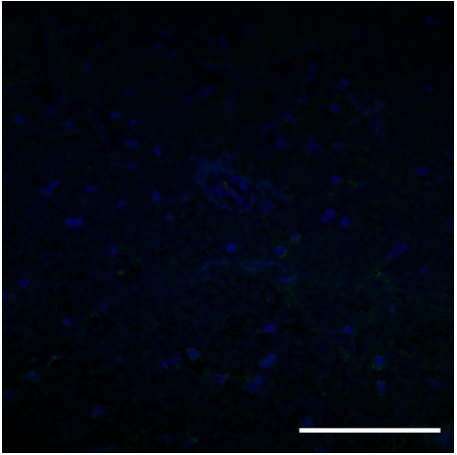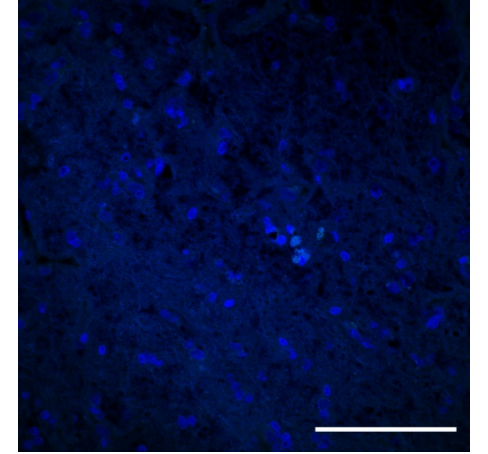

Control: separate section

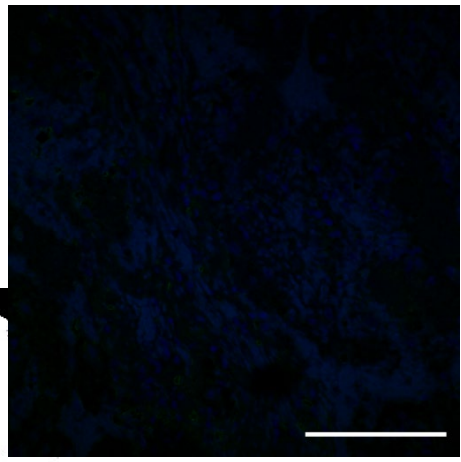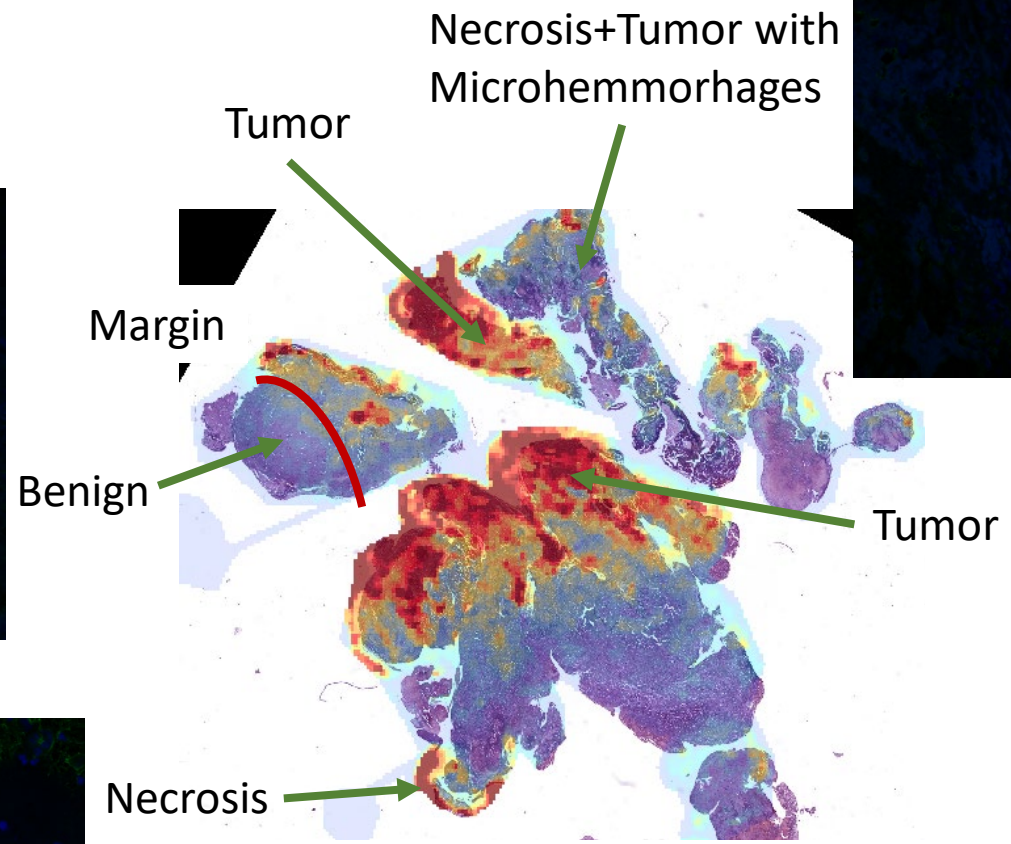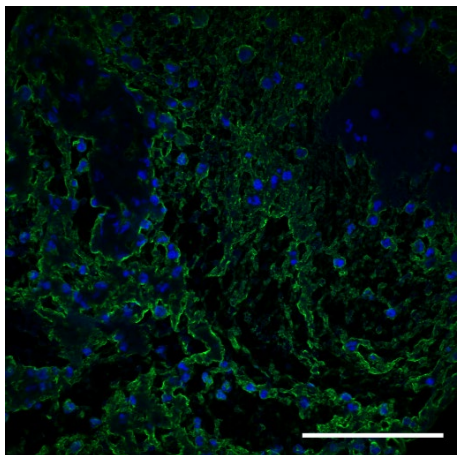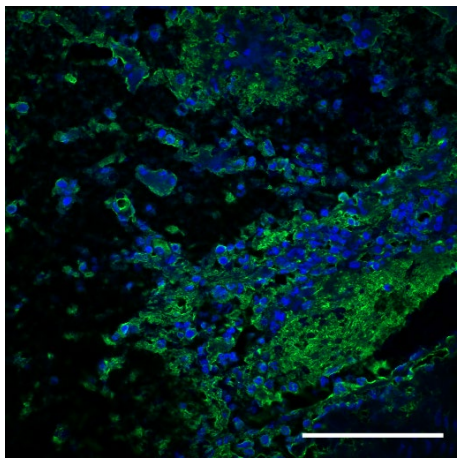

Green=positive for SNA lectin staining  
Blue=DAPI

SD 4B

VH15-1139A

Glioblastoma (Grade IV WHO)

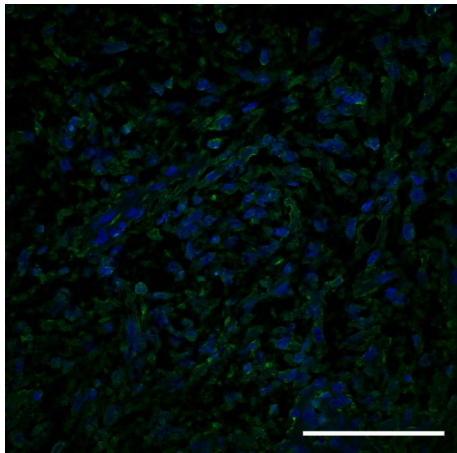

Pseudopalisading

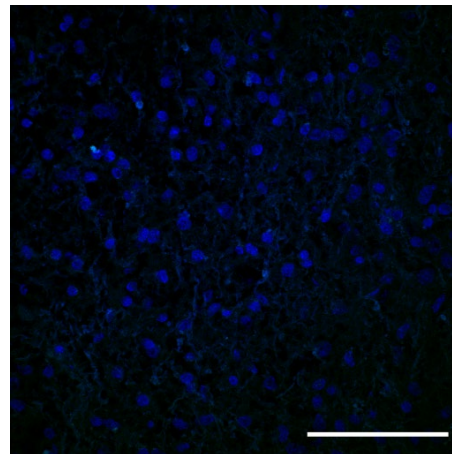

Control: separate section

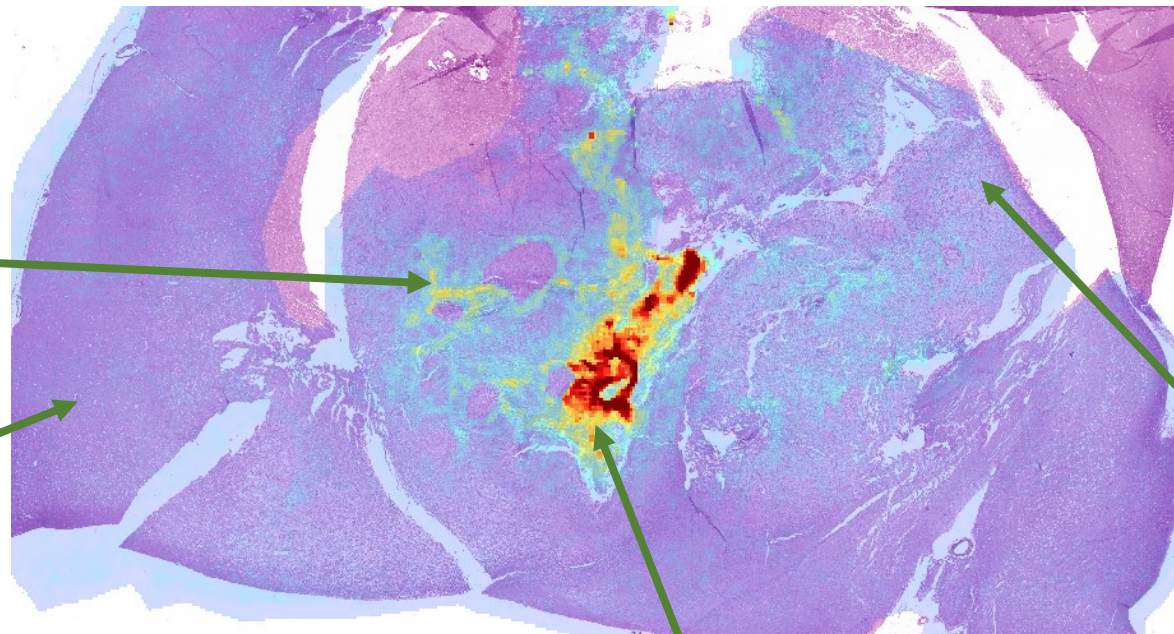

Benign cortex

Necrosis

Tumor

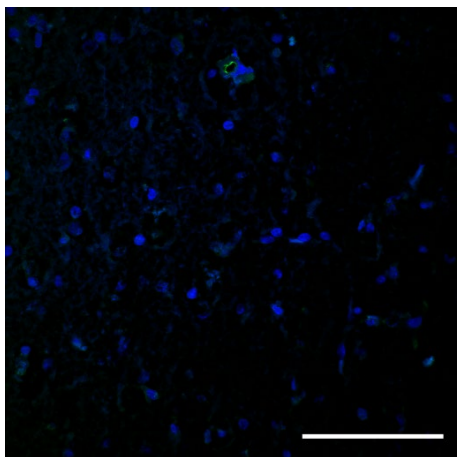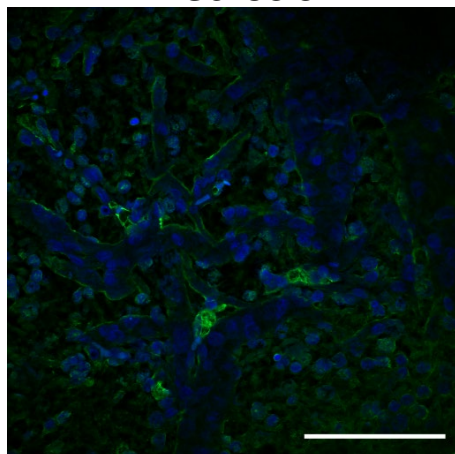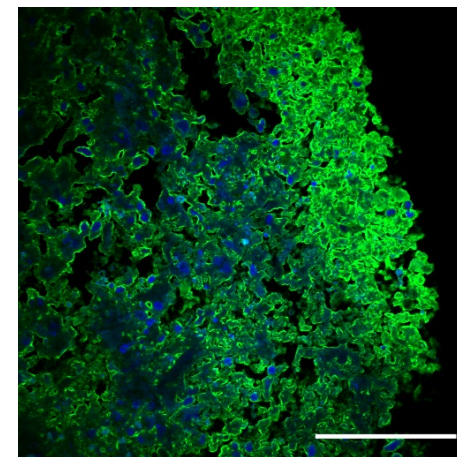

SD 4C

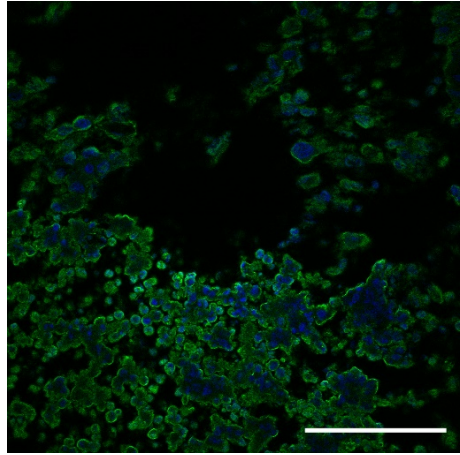

# VH15-1139D

Glioblastoma (Grade IV WHO)

Necrosis

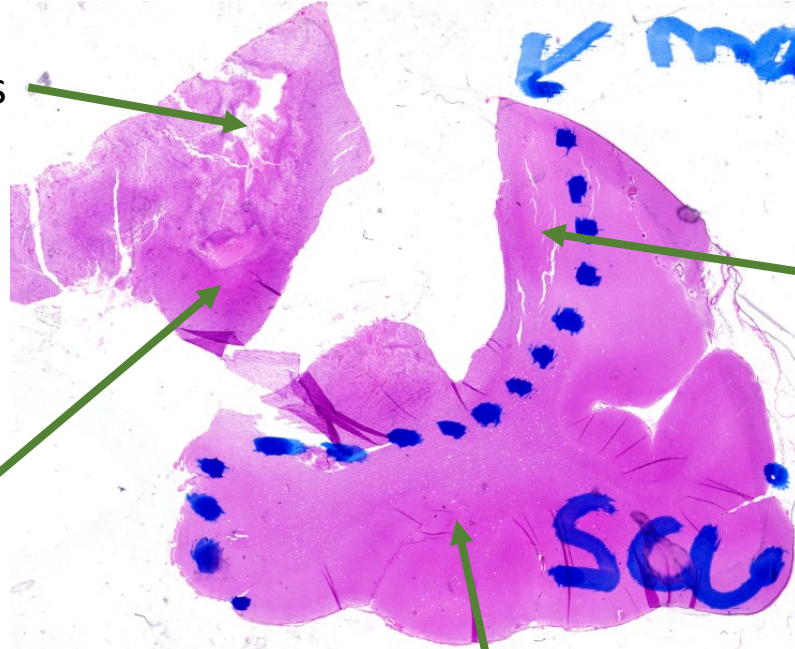

Tumor

Margin

Benign

Control: separate section

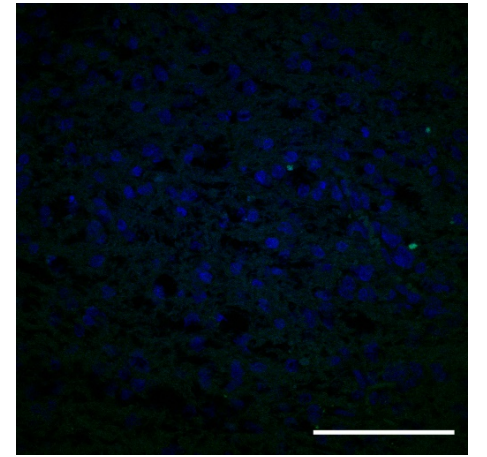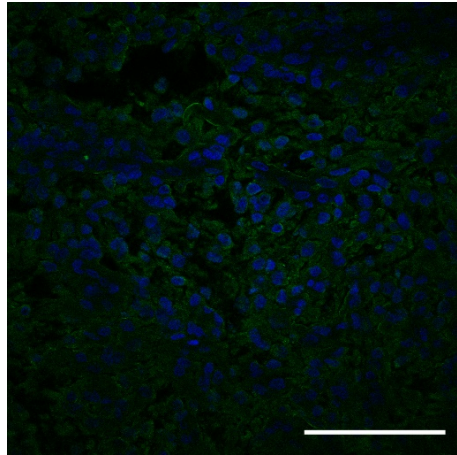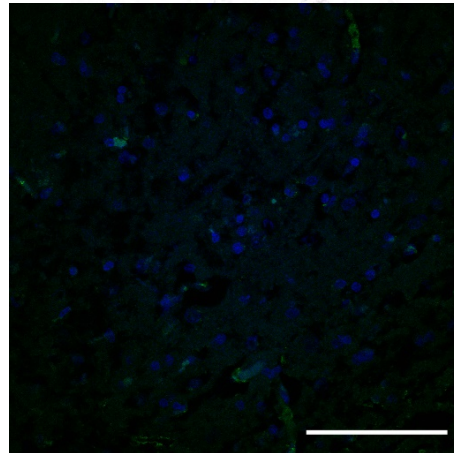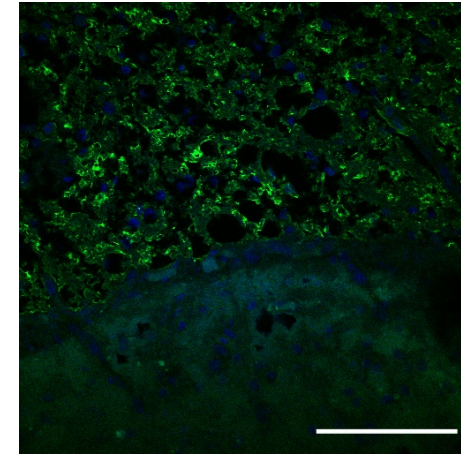

SD 4D

# VH15-3520A

Anaplastic Oligodendroglioma (Grade III WHO)

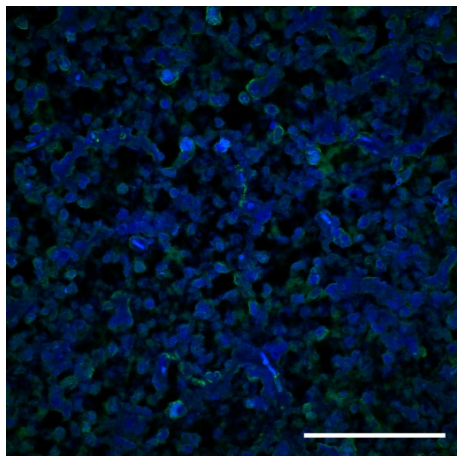

Tumor

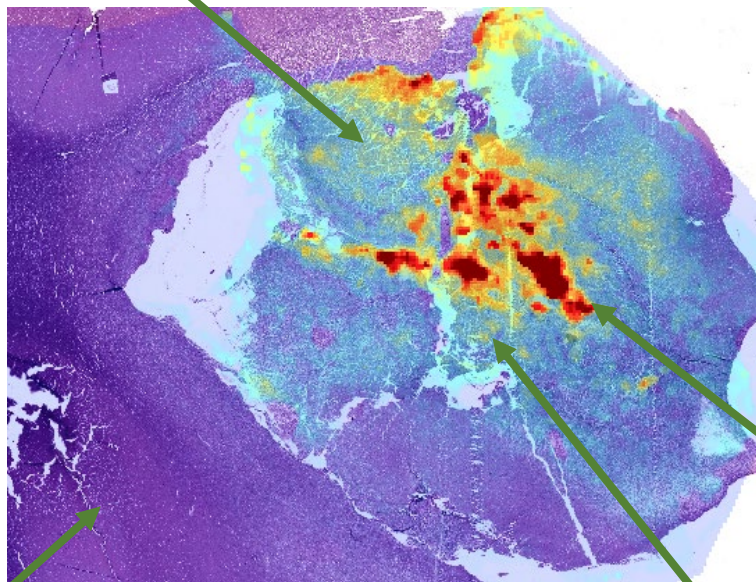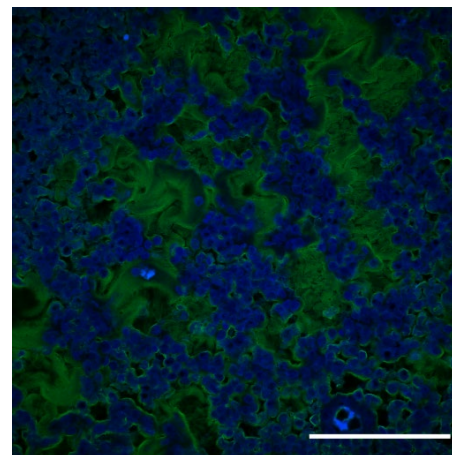

Control: separate section

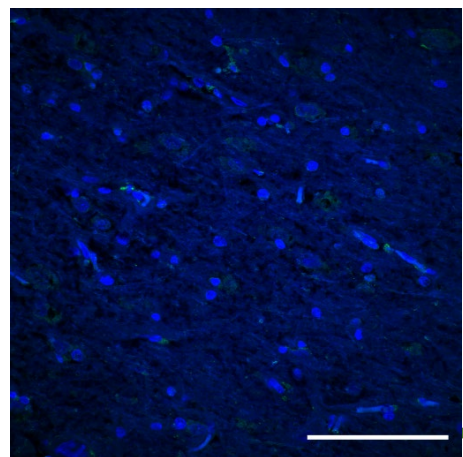

Benign cortex

Necrosis+Tumor

Signal fills empty spaces on necrotic zones

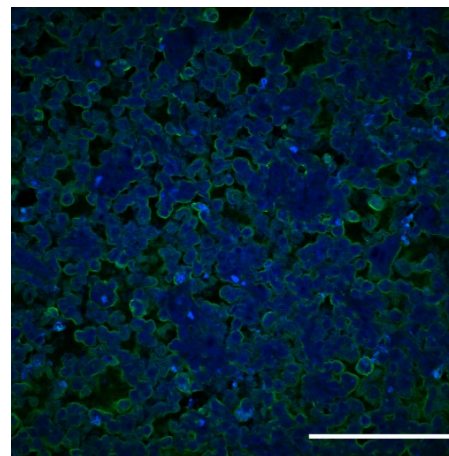

SD 4E

# VH16-0703A

Anaplastic Oligodendroglioma (Grade III WHO)

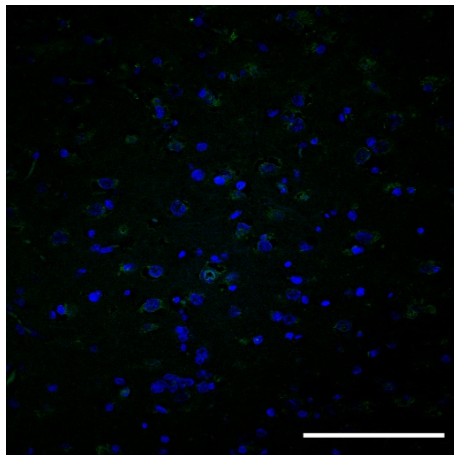

Benign – No signal on Cortex

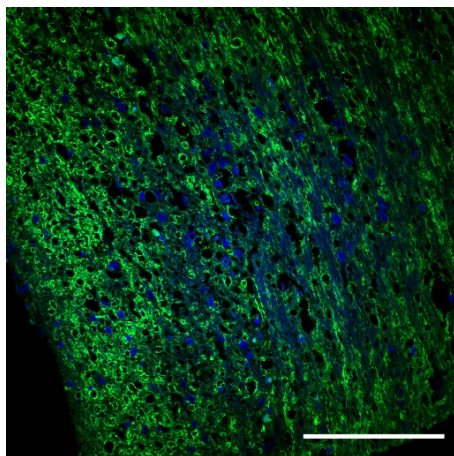

Benign – Intense signal on corpus callosum

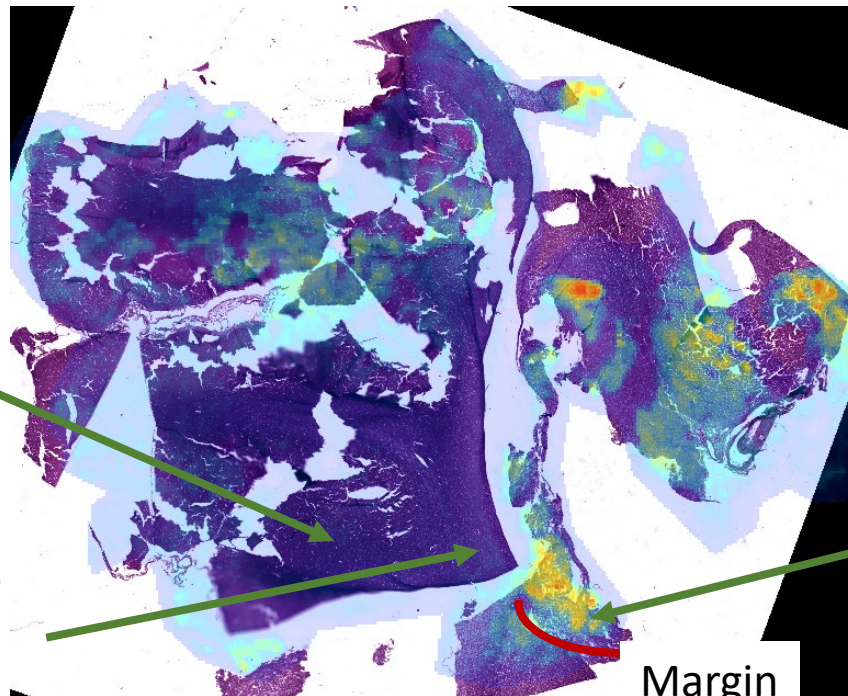

Necrosis

Margin

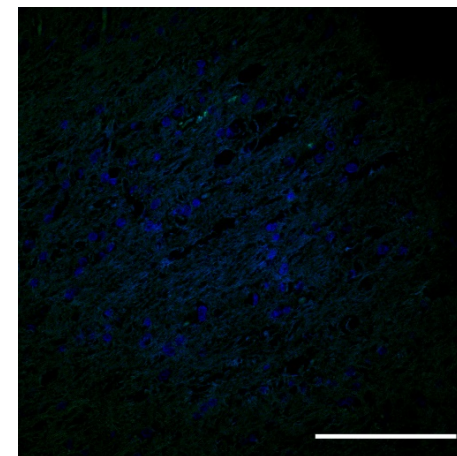

Control: separate section

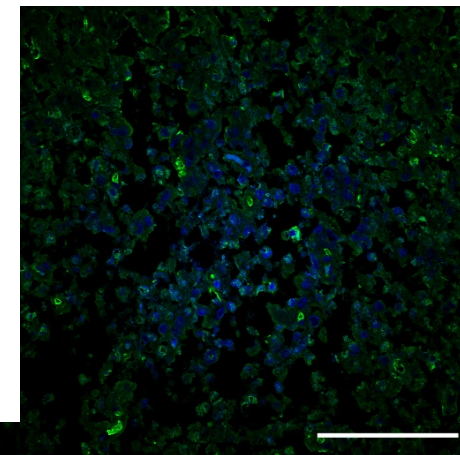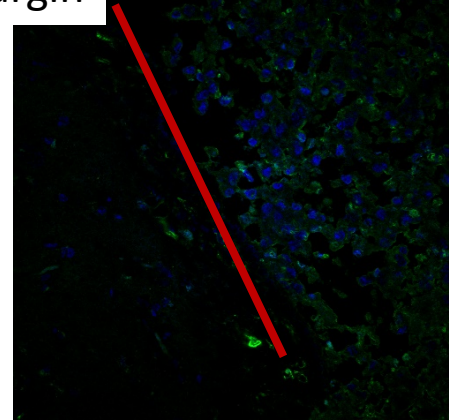

SD 4F

VH16-0703B

Anaplastic Oligodendroglioma (Grade III WHO)

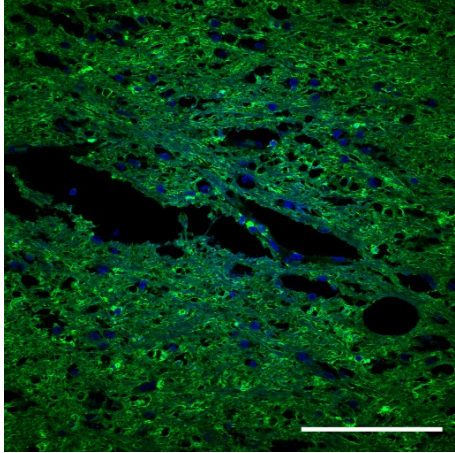

Benign – Intense signal on corpus callosum

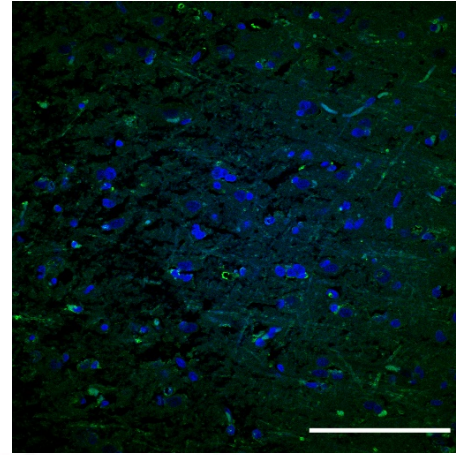

Benign – No signal on Cortex

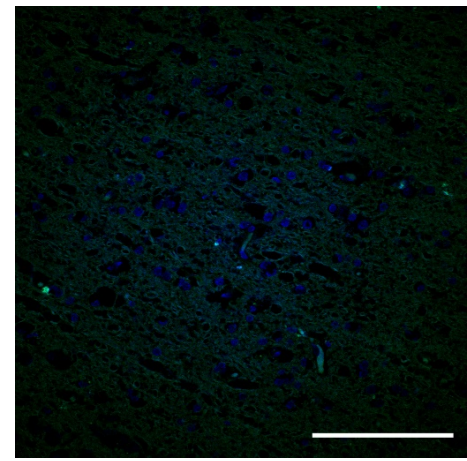

Control: separate section

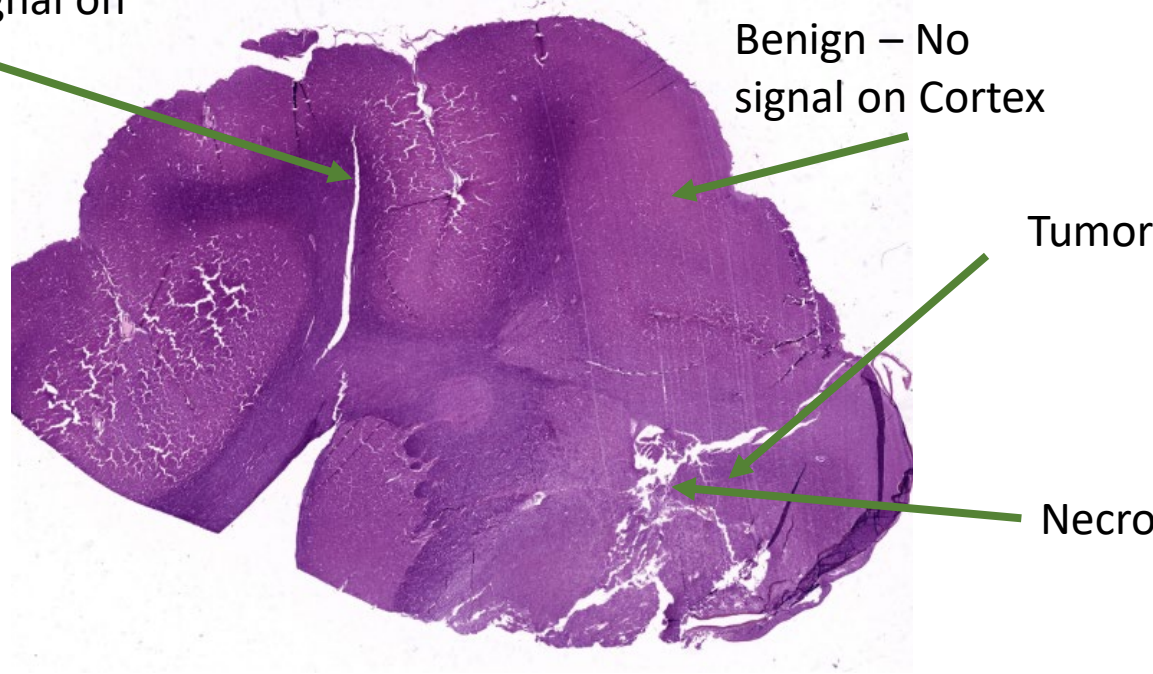

Tumor

Necrosis

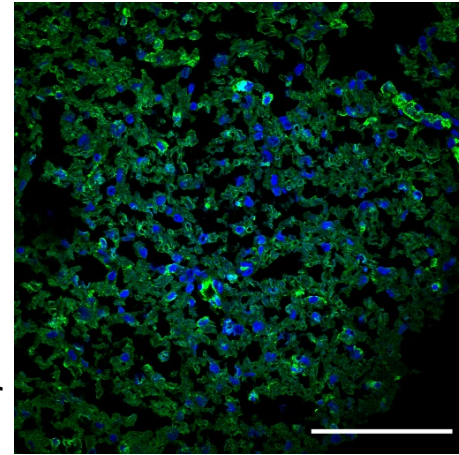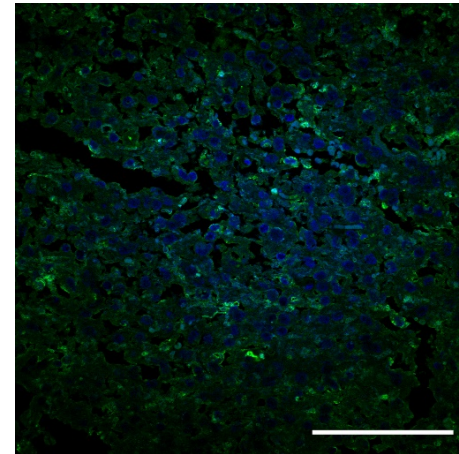



SD 4G

VH13-0935

Anaplastic Oligodendroglioma (Grade III WHO)

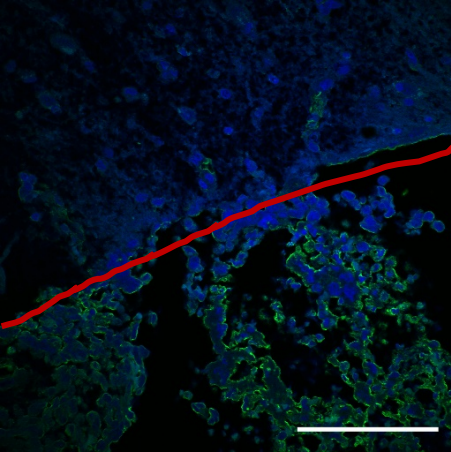

Margin

Tumor

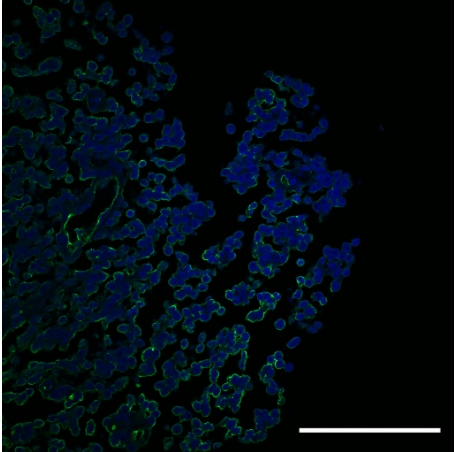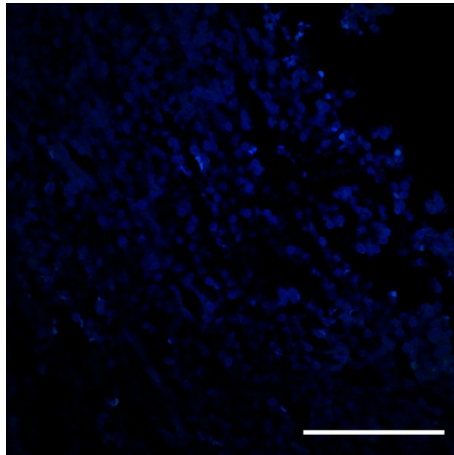

Control: separate section

Benign

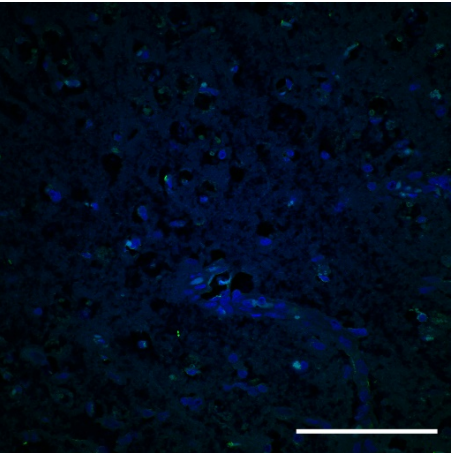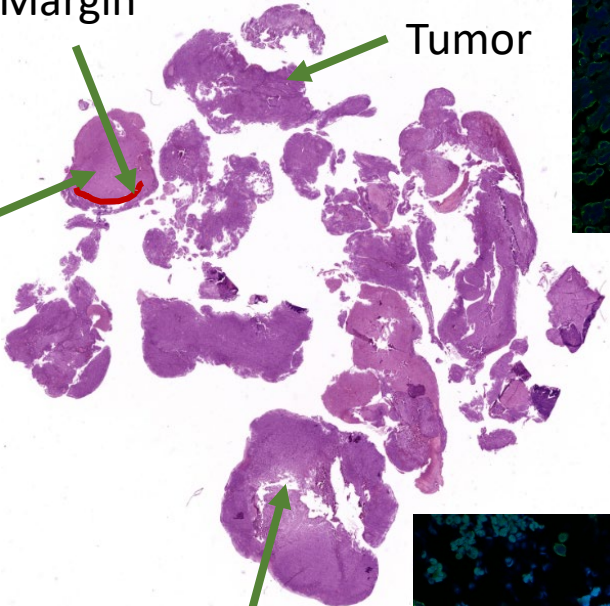

Necrosis

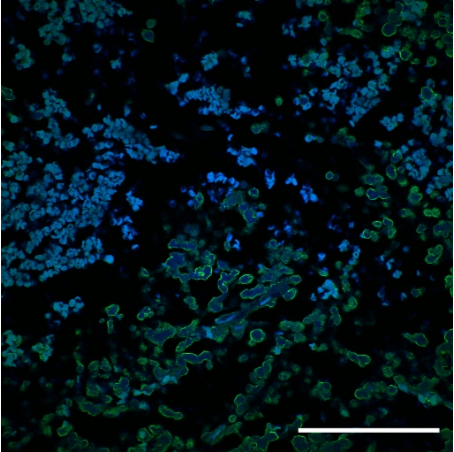

SD 4H

# VH16-0440C

Anaplastic Oligodendroglioma (Grade III WHO)

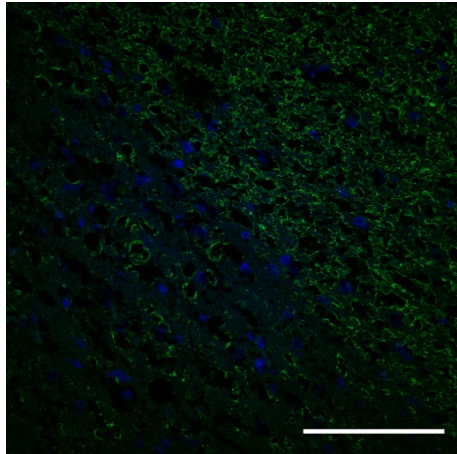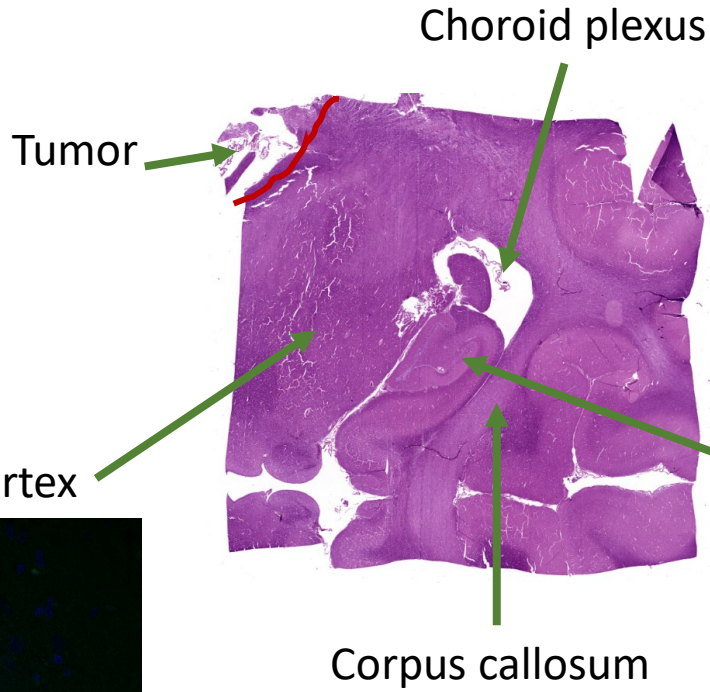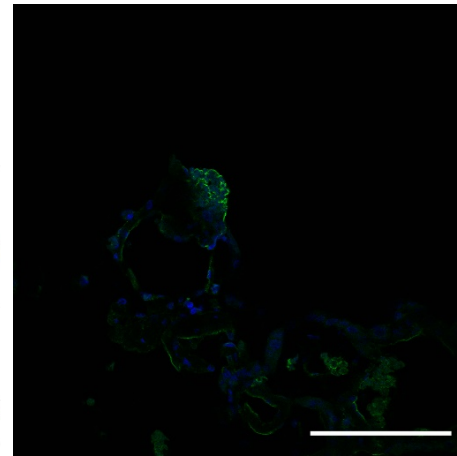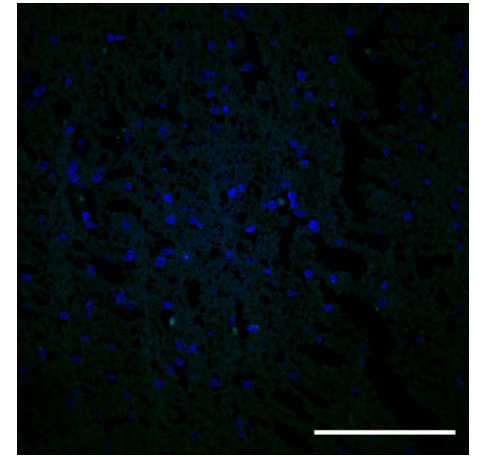

Control: separate section

Cortex

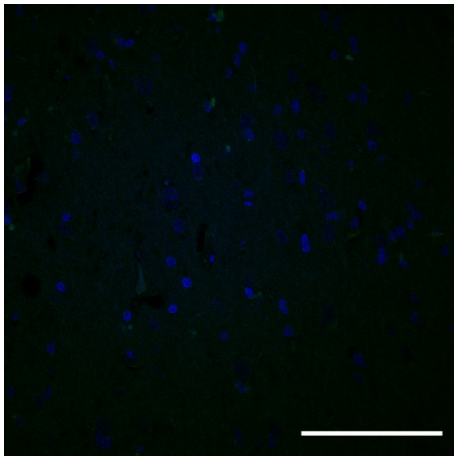

Hippocampus

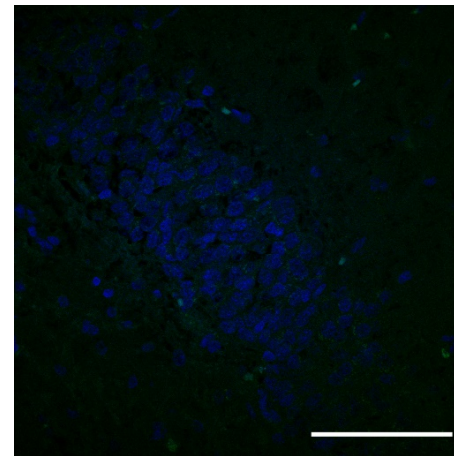

Corpus callosum

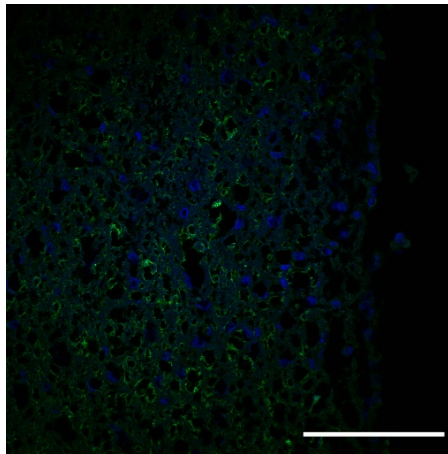

SD 4I

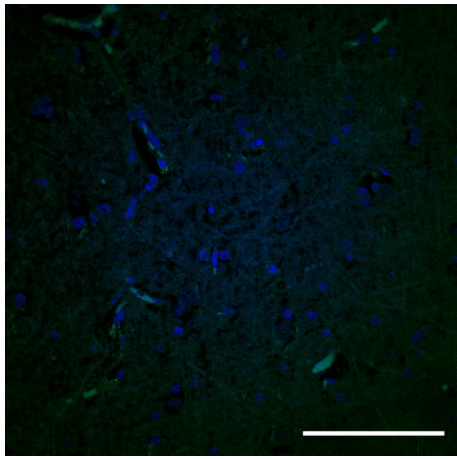

# VH16-0440D

Anaplastic Oligodendroglioma (Grade III WHO)

No visible tumor/necrotic zone

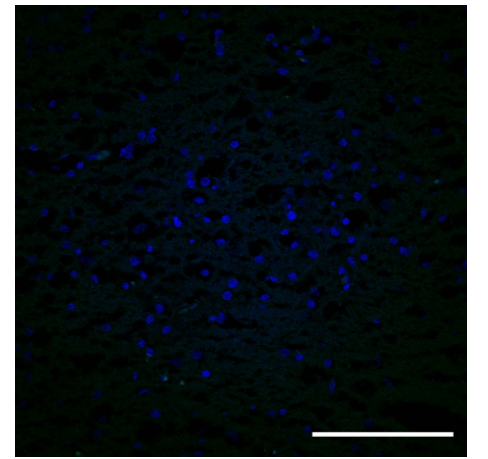

Control: separate section

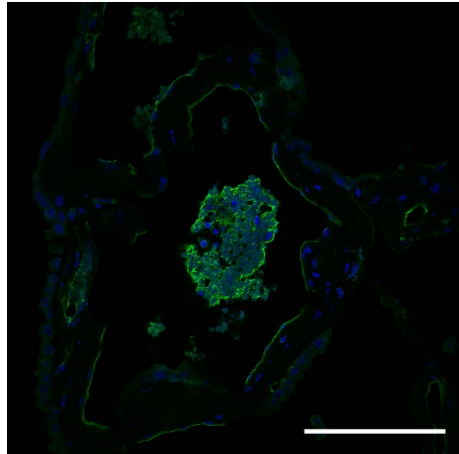

Choroid plexus

Hippocampus

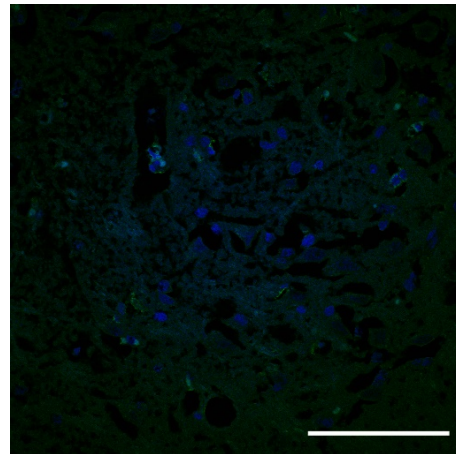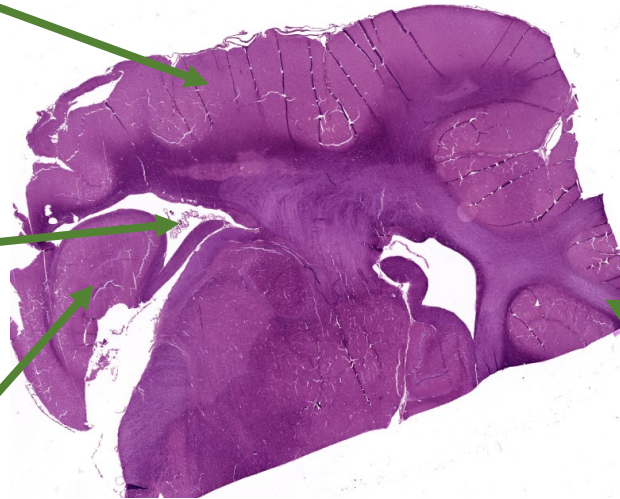

Cortex

Corpus callosum

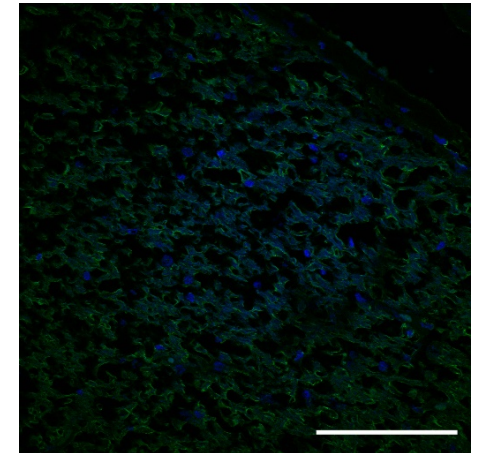

## N-linked Glycans

## O-linked Glycans

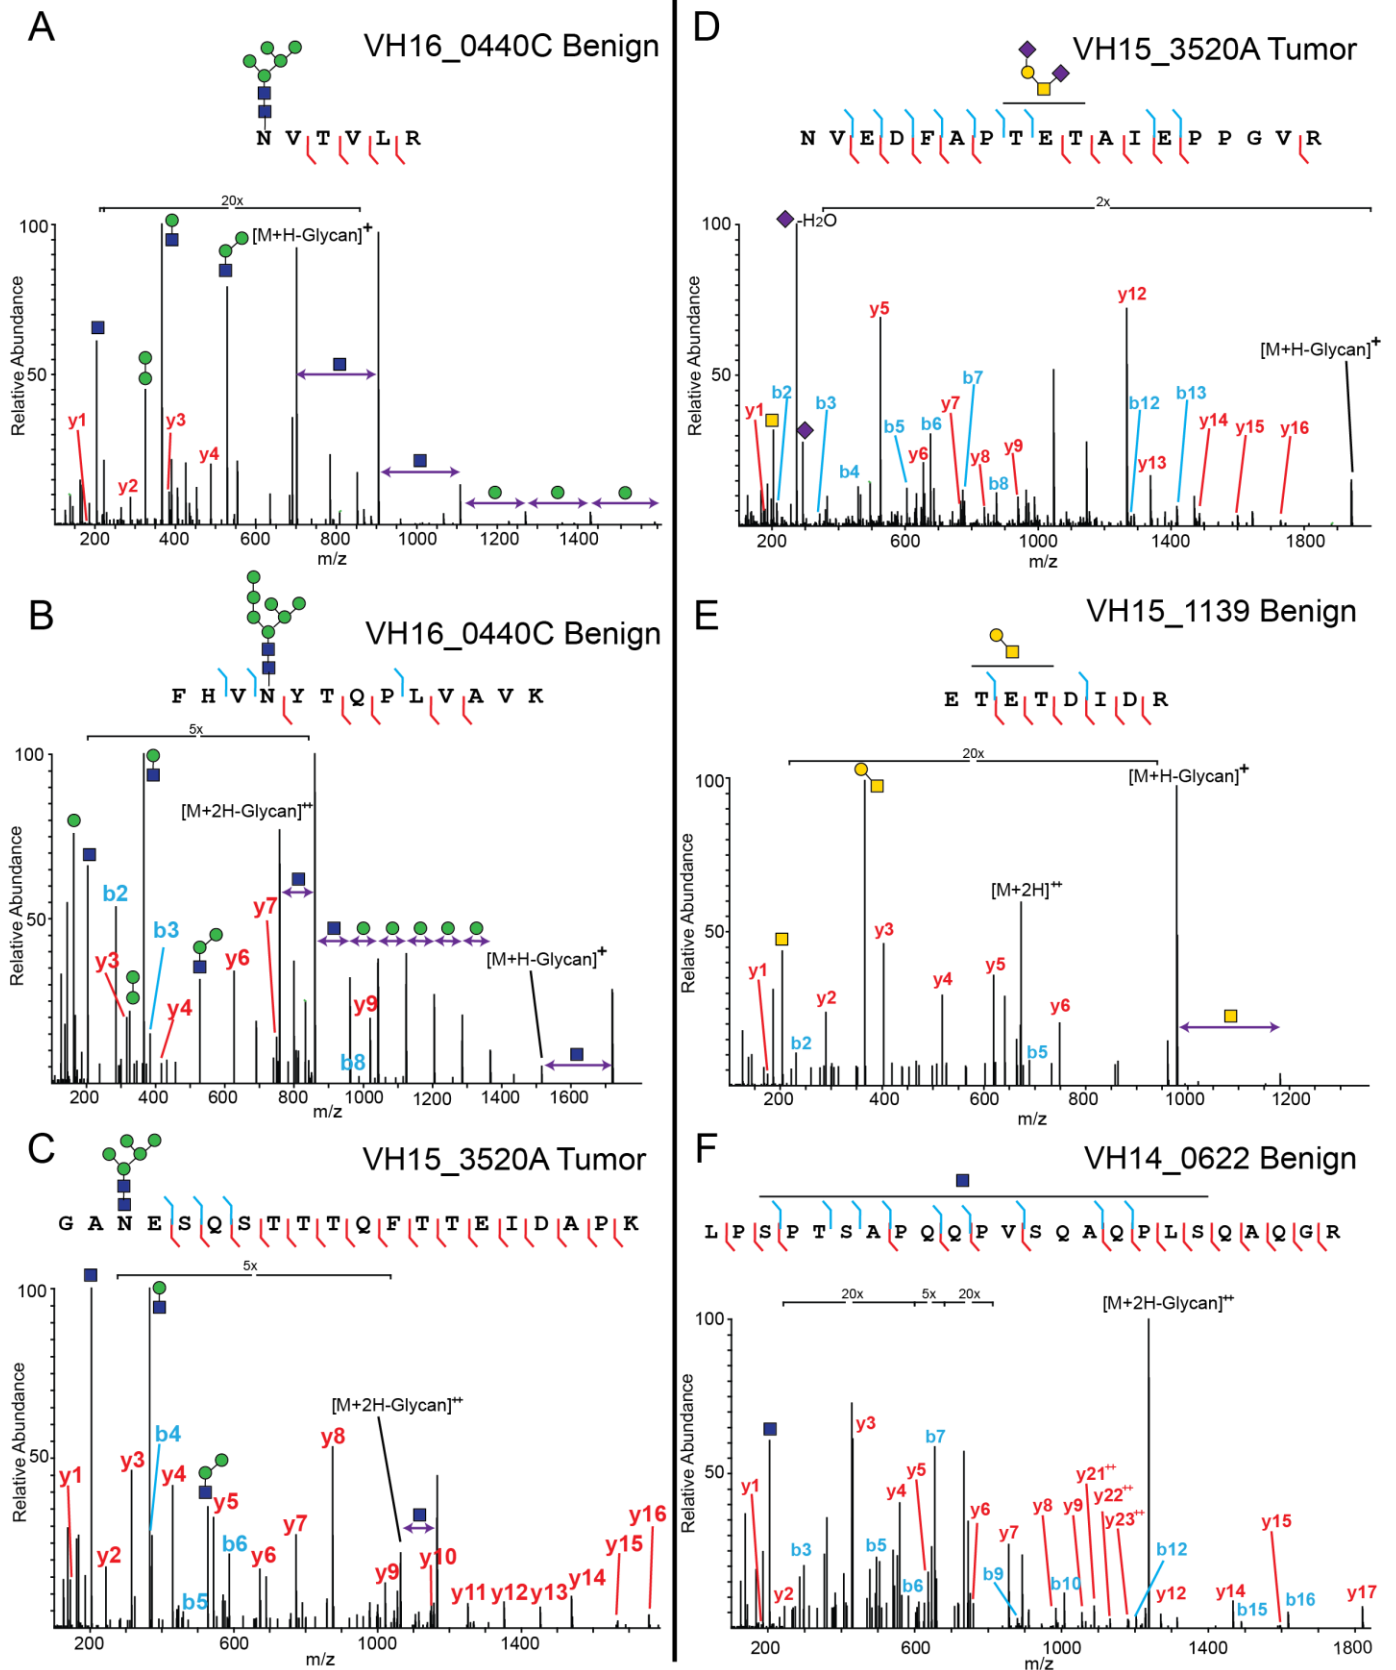

**Supplementary Data 5. Additional annotated glycopeptide MS2 spectra.** All microdigested samples were subjected to LC-MS/MS analysis on a Thermo Orbitrap Fusion Tribrid, and peptides were subjected to HCD fragmentation. Spectra were annotated manually to confirm glycan composition, peptide sequence, and (if possible) site localize the glycan. (Left) N-glycopeptide spectra, (right) O-glycopeptide spectra. Related to Figure 4.

### Supplemental Data 7: Clinical data of Glioma Samples, Related to Figures 1-5

| Code        | Breed           | Age (years) | Sex | N/US     | Type of Cancer                               | Area of brain                                              |
|-------------|-----------------|-------------|-----|----------|----------------------------------------------|------------------------------------------------------------|
| VH 15 1139A | Boxer           | 9           | F   | Neutered | Glioblastoma (Grade IV WHO)                  | Cortex left hemisphere                                     |
| VH 15 1139D |                 |             |     |          |                                              |                                                            |
| VH 16 0440C | French bulldog  | 7           | M   | Unspayed | Anaplastic Oligodendroglioma (Grade III WHO) | Cortex left hemisphere                                     |
| VH 16 0440D |                 |             |     |          |                                              |                                                            |
| VH 16 0703A | French bulldog  | 8           | M   | Unspayed | Anaplastic Oligodendroglioma (Grade III WHO) | Cortex Right hemisphere                                    |
| VH 16 0703B |                 |             |     |          |                                              |                                                            |
| VH 13 0935  | French bulldog  | 8           | F   | Neutered | Anaplastic Oligodendroglioma (Grade III WHO) | Left parietal lobe (cranial aspect)                        |
| VH 14 0622  | Border Collie   | 13          | F   | Unspayed | Glioblastoma (Grade IV WHO)                  | junction between parietal and frontal lobe left hemisphere |
| VH 15 3520A | English bulldog | 5           | F   | Unspayed | Anaplastic Oligodendroglioma (Grade III WHO) | Left rhinencephalus                                        |

**Supplementary Data 8. Principal component analysis results.** H&E images were uploaded on SCiLS software and co-registered with the ion images to help define the regions of interest (ROIs). The ROIs are shown in **A**, marked with green, red and blue outlines corresponding to benign, necrosis and tumor regions, respectively. Spectra from these ROIs were extracted and subjected to PCA. Panels in **B** show different views of the 3D scores plot using PC1, PC2 and PC4. The first five principal components explain about 90% of the variance observed, more than 50% of which are explained by the first component (**C**). Related to Figure 1.

**A**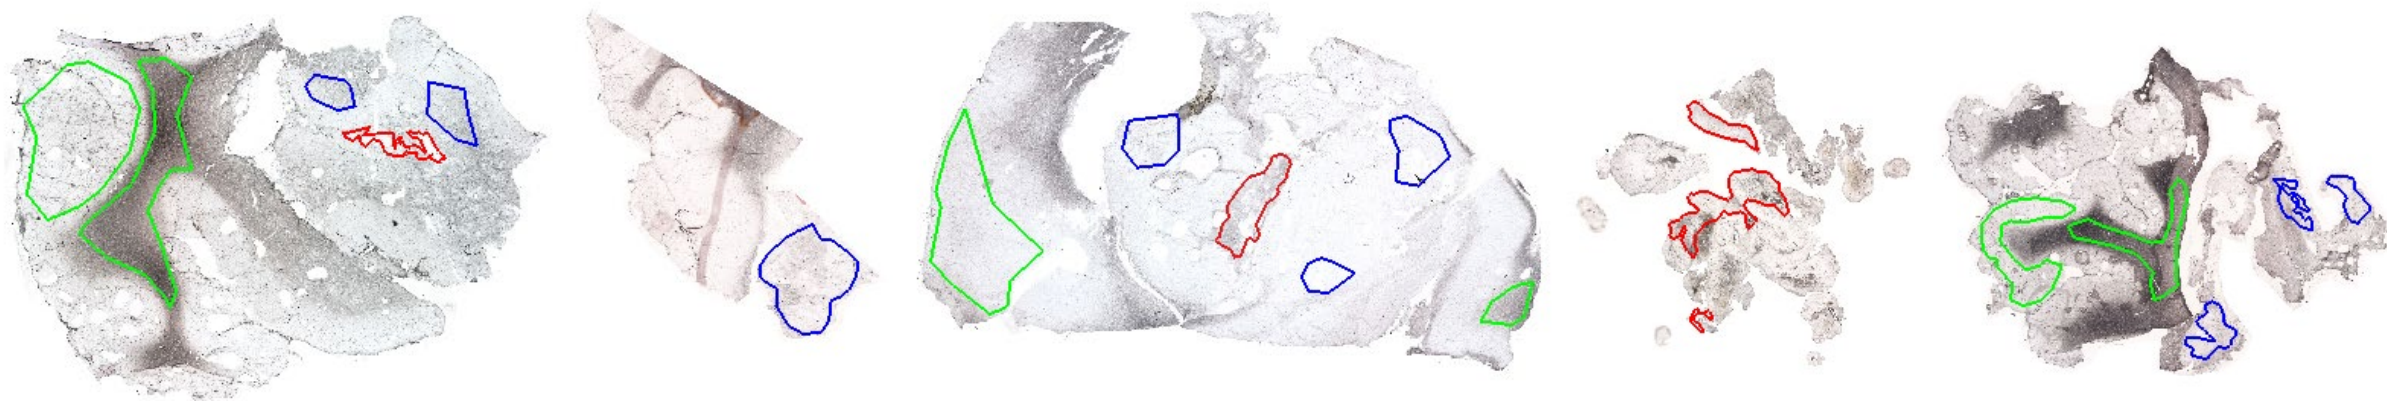**B**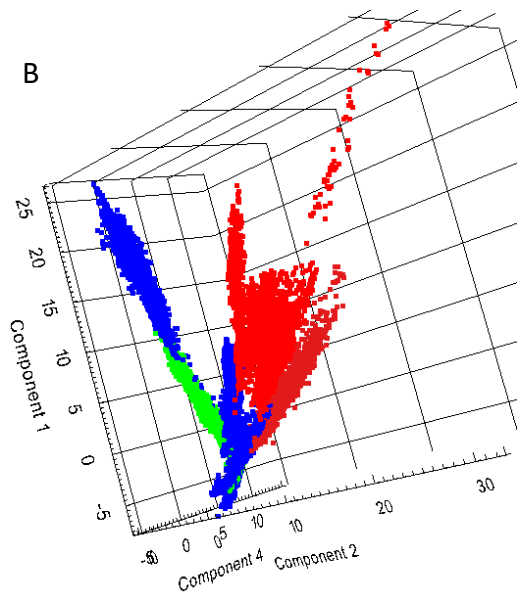**C**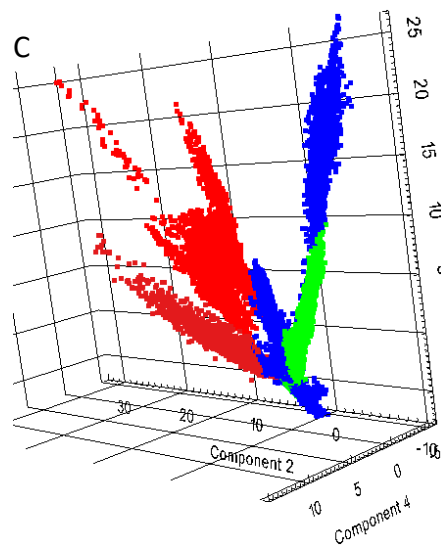**D**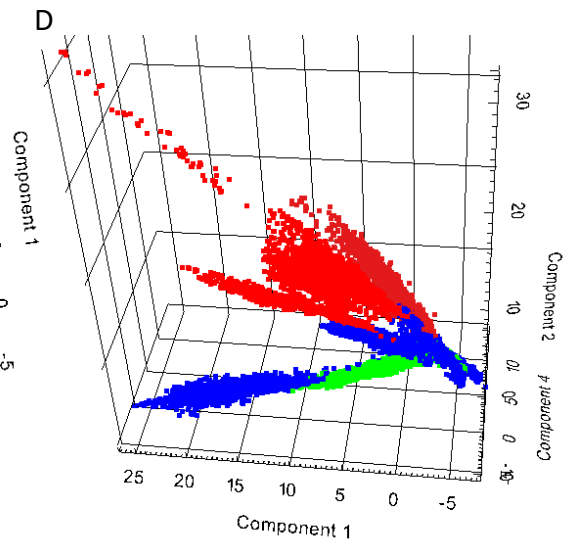**E**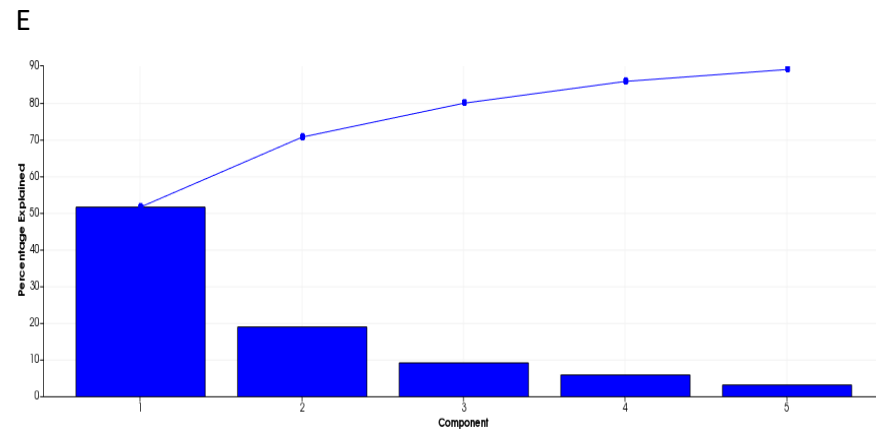

Supplement: NIHMS1736074-supplement-Document_S1__Data_S1__S2__S4__S5__and_S7_.pdf [file NIHMS1736074-supplement-Document_S1__Data_S1__S2__S4__S5__and_S7_.pdf]
